# Supplementary material for: Salivary microbiomes of indigenous Tsimane mothers and infants are distinct despite frequent premastication
Source: PubMed Central journal article supplement (PMC5101600; doi:10.7717/peerj.2660), 2016-11-03

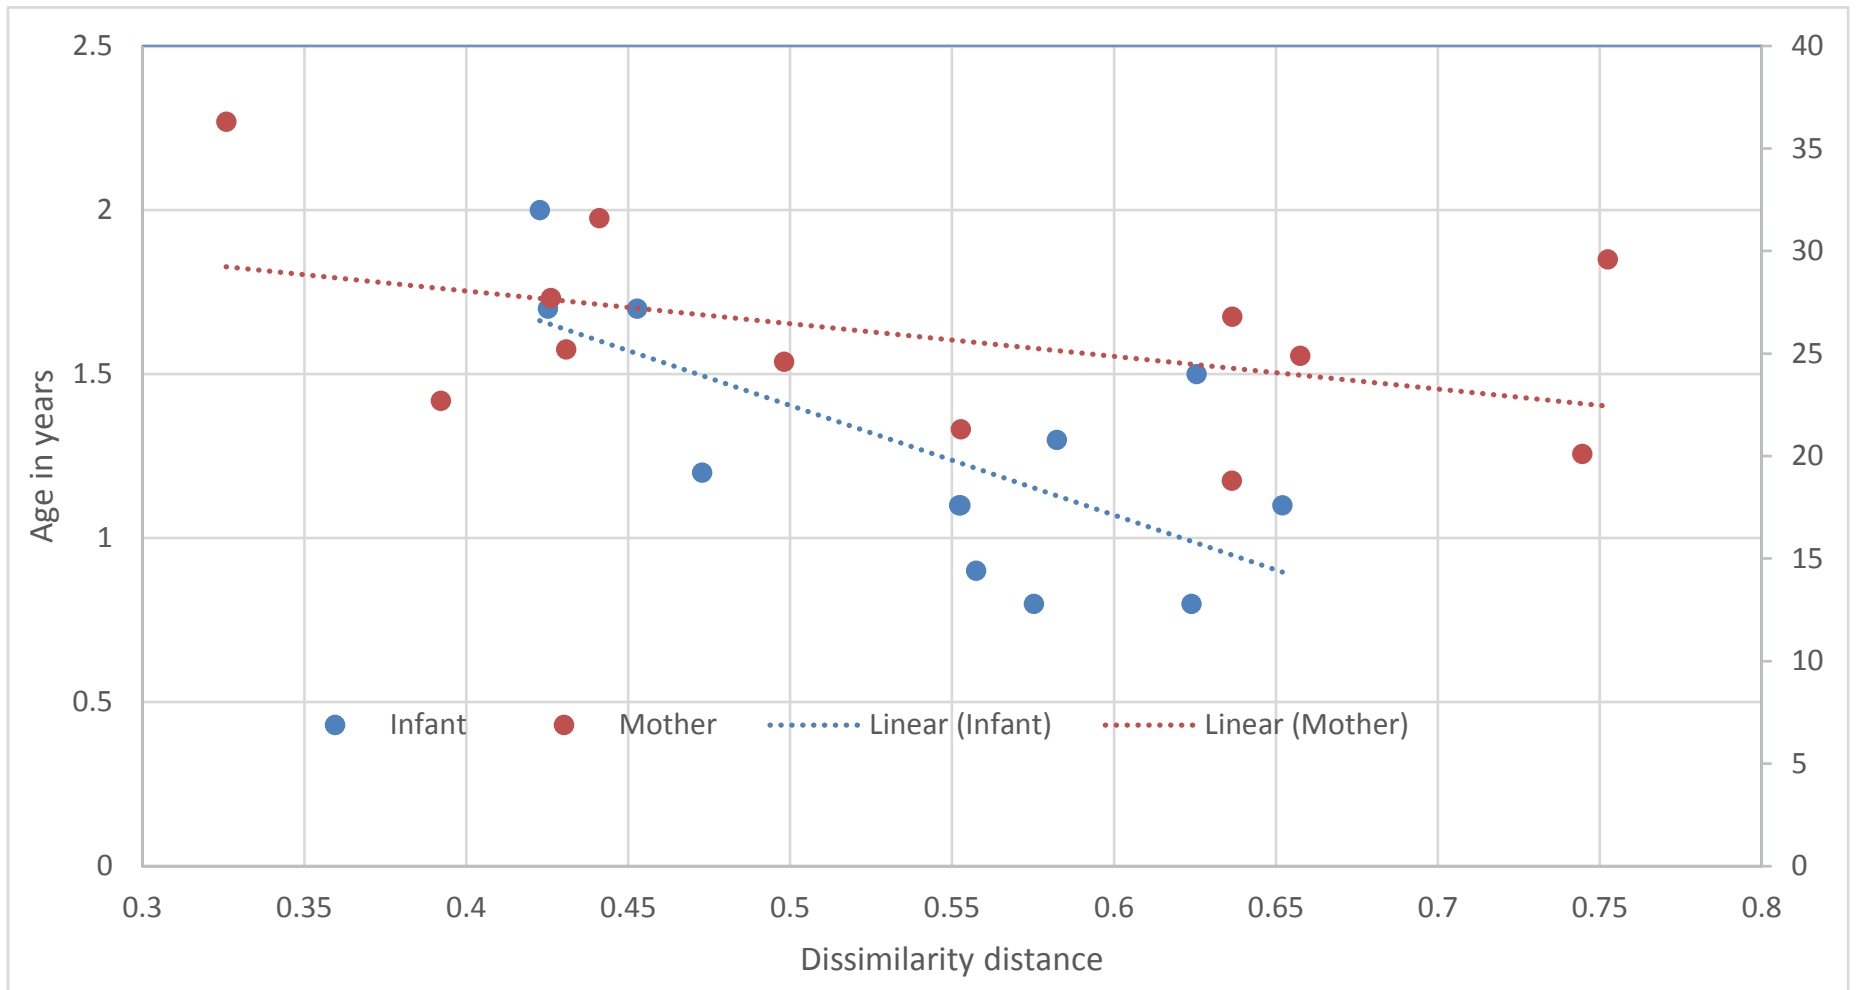

Supplement: peerj-04-2660-s003.pdf [file peerj-04-2660-s003.pdf]
