# Supplementary material for: Salivary microbiomes of indigenous Tsimane mothers and infants are distinct despite frequent premastication
Source: PeerJ. 2016 Nov 3;4:e2660. doi: 10.7717/peerj.2660 (PMC5101600; doi:10.7717/peerj.2660)
Supplement: Supplemental Information 1 [file peerj-04-2660-s004.xlsx]

## Sheet: ST 1
Supplementary Table 1. Sequencing yield for the 26 samples.
Sample ID	Index	Yield (Mbases)	# Reads	% Perfect Index Reads	% of >= Q30 Bases (PF)	Mean Quality Score (PF)
FD12	TATCGTTGACCA	381	1518768	100	88.49	34.59
FD14	CCAGTGTATGCA	27	109042	100	89.04	34.78
MSA1	TGAGTCACTGGT	11	43740	100	89.17	34.81
BSA1	ACACCTGGTGAT	13	50780	100	90.66	35.16
MSA2	GGAGACAAGGGA	3	12636	100	87.92	34.3
BSA2	TTACTGTGCGAT	18	70498	100	88.87	34.73
MSA3	AGGCTACACGAC	3	11116	100	86.66	33.93
BSA3	CTAACCTCCGCT	4	16660	100	87.69	34.35
MSA4	GAACCAAAGGAT	63	252410	100	90.98	35.29
BSA4	GTATGCGCTGTA	37	145916	100	89.2	34.79
MSA8	GTACATACCGGT	9	36298	100	89.55	34.85
BSA8	TCCGACACAATT	24	96644	100	88.81	34.67
MSA9	AATCAGTCTCGT	157	626658	100	89.07	34.76
BSA9	CCTCGTTCGACT	21	85022	100	88.03	34.43
MSA10	AATCCGTACAGC	60	238476	100	88.21	34.5
BSA10	GACTTGGTATTC	15	58772	100	88.9	34.68
MSA11	TACACGATCTAC	22	85704	100	89.79	34.93
BSA11	GCACACACGTTA	11	44310	100	88.63	34.63
MSA12	CACGCCATAATG	149	595148	100	88.94	34.72
BSA12	CAGGCGTATTGG	78	309586	100	86.18	33.95
MSA13	GGATCGCAGATC	19	76348	100	88.49	34.6
BSA13	GCTGATGAGCTG	158	630518	100	88.81	34.69
MSA14	AGCTGTTGTTTG	5	18130	100	86.48	33.94
BSA14	GGATGGTGTTGC	32	128486	100	90.16	35.09
MSA15	GCGATATATCGC	160	636760	100	88.05	34.5
BSA15	TAGGATTGCTCG	24	94110	100	87.34	34.29

## Sheet: ST 2
Supplementary Table 2. Texonamy distribution of V4 16S seqences.
taxlevel	rankID	taxon	daughterlevels	total	BSA1	BSA10	BSA11	BSA12	BSA13	BSA14	BSA15	BSA2	BSA3	BSA4	BSA8	BSA9	MFD	MSA1	MSA10	MSA11	MSA12	MSA13	MSA14	MSA15	MSA2	MSA3	MSA4	MSA8	MSA9	RFD
0	0	Root	1	1975881	12985	14229	8887	100963	172382	33445	31656	21301	4372	42151	26072	24750	580629	16152	76291	17487	225932	30104	6158	257078	3148	3187	46874	13292	169939	36417
1	0.1	Bacteria	19	1975881	12985	14229	8887	100963	172382	33445	31656	21301	4372	42151	26072	24750	580629	16152	76291	17487	225932	30104	6158	257078	3148	3187	46874	13292	169939	36417
2	0.1.1	Acidobacteria	5	187	0	0	0	1	0	0	0	0	0	0	0	0	182	0	0	0	2	0	0	1	0	0	1	0	0	0
3	0.1.1.1	Acidobacteria_Gp10	1	22	0	0	0	0	0	0	0	0	0	0	0	0	22	0	0	0	0	0	0	0	0	0	0	0	0	0
4	0.1.1.1.1	Acidobacteria_Gp10_order_incertae_sedis	1	22	0	0	0	0	0	0	0	0	0	0	0	0	22	0	0	0	0	0	0	0	0	0	0	0	0	0
5	0.1.1.1.1.1	Acidobacteria_Gp10_family_incertae_sedis	1	22	0	0	0	0	0	0	0	0	0	0	0	0	22	0	0	0	0	0	0	0	0	0	0	0	0	0
6	0.1.1.1.1.1.1	Gp10	0	22	0	0	0	0	0	0	0	0	0	0	0	0	22	0	0	0	0	0	0	0	0	0	0	0	0	0
3	0.1.1.3	Acidobacteria_Gp3	1	114	0	0	0	1	0	0	0	0	0	0	0	0	112	0	0	0	0	0	0	1	0	0	0	0	0	0
4	0.1.1.3.1	Acidobacteria_Gp3_order_incertae_sedis	1	114	0	0	0	1	0	0	0	0	0	0	0	0	112	0	0	0	0	0	0	1	0	0	0	0	0	0
5	0.1.1.3.1.1	Acidobacteria_Gp3_family_incertae_sedis	1	114	0	0	0	1	0	0	0	0	0	0	0	0	112	0	0	0	0	0	0	1	0	0	0	0	0	0
6	0.1.1.3.1.1.1	Gp3	0	114	0	0	0	1	0	0	0	0	0	0	0	0	112	0	0	0	0	0	0	1	0	0	0	0	0	0
3	0.1.1.4	Acidobacteria_Gp4	1	25	0	0	0	0	0	0	0	0	0	0	0	0	23	0	0	0	1	0	0	0	0	0	1	0	0	0
4	0.1.1.4.1	Acidobacteria_Gp4_order_incertae_sedis	1	25	0	0	0	0	0	0	0	0	0	0	0	0	23	0	0	0	1	0	0	0	0	0	1	0	0	0
5	0.1.1.4.1.1	Acidobacteria_Gp4_family_incertae_sedis	1	25	0	0	0	0	0	0	0	0	0	0	0	0	23	0	0	0	1	0	0	0	0	0	1	0	0	0
6	0.1.1.4.1.1.1	Gp4	0	25	0	0	0	0	0	0	0	0	0	0	0	0	23	0	0	0	1	0	0	0	0	0	1	0	0	0
3	0.1.1.5	Acidobacteria_Gp6	1	25	0	0	0	0	0	0	0	0	0	0	0	0	25	0	0	0	0	0	0	0	0	0	0	0	0	0
4	0.1.1.5.1	Acidobacteria_Gp6_order_incertae_sedis	1	25	0	0	0	0	0	0	0	0	0	0	0	0	25	0	0	0	0	0	0	0	0	0	0	0	0	0
5	0.1.1.5.1.1	Acidobacteria_Gp6_family_incertae_sedis	1	25	0	0	0	0	0	0	0	0	0	0	0	0	25	0	0	0	0	0	0	0	0	0	0	0	0	0
6	0.1.1.5.1.1.1	Gp6	0	25	0	0	0	0	0	0	0	0	0	0	0	0	25	0	0	0	0	0	0	0	0	0	0	0	0	0
2	0.1.10	Proteobacteria	6	500998	124	2067	65	5786	16725	2834	408	285	133	2219	4141	2369	254739	233	18605	4587	117998	4004	526	31457	181	430	1512	4983	21020	3567
3	0.1.10.1	Alphaproteobacteria	7	19627	25	91	29	196	139	164	160	10	13	17	34	34	16274	76	22	61	1000	803	100	192	8	8	19	17	107	28
4	0.1.10.1.1	Alphaproteobacteria_order_incertae_sedis	1	109	0	0	0	0	0	0	0	0	0	0	0	0	109	0	0	0	0	0	0	0	0	0	0	0	0	0
5	0.1.10.1.1.1	Alphaproteobacteria_family_incertae_sedis	1	109	0	0	0	0	0	0	0	0	0	0	0	0	109	0	0	0	0	0	0	0	0	0	0	0	0	0
6	0.1.10.1.1.1.1	Geminicoccus	0	109	0	0	0	0	0	0	0	0	0	0	0	0	109	0	0	0	0	0	0	0	0	0	0	0	0	0
4	0.1.10.1.2	Caulobacterales	1	1324	2	0	0	2	2	1	5	0	0	1	2	0	1259	3	1	3	12	5	0	12	0	0	2	0	11	1
5	0.1.10.1.2.1	Caulobacteraceae	3	1324	2	0	0	2	2	1	5	0	0	1	2	0	1259	3	1	3	12	5	0	12	0	0	2	0	11	1
6	0.1.10.1.2.1.1	Brevundimonas	0	950	0	0	0	1	0	0	0	0	0	1	0	0	936	0	1	0	10	0	0	0	0	0	0	0	1	0
6	0.1.10.1.2.1.2	Phenylobacterium	0	235	2	0	0	1	2	1	5	0	0	0	2	0	185	3	0	3	2	5	0	12	0	0	2	0	9	1
6	0.1.10.1.2.1.3	unclassified	0	139	0	0	0	0	0	0	0	0	0	0	0	0	138	0	0	0	0	0	0	0	0	0	0	0	1	0
4	0.1.10.1.3	Rhizobiales	10	2380	2	2	1	5	6	1	1	1	0	2	1	1	2326	3	1	1	15	0	1	2	0	0	1	1	4	2
5	0.1.10.1.3.1	Aurantimonadaceae	1	88	0	0	0	0	0	0	0	0	0	0	0	0	88	0	0	0	0	0	0	0	0	0	0	0	0	0
6	0.1.10.1.3.1.1	Aurantimonas	0	88	0	0	0	0	0	0	0	0	0	0	0	0	88	0	0	0	0	0	0	0	0	0	0	0	0	0
5	0.1.10.1.3.10	unclassified	1	255	0	0	0	0	3	0	0	0	0	0	0	0	245	0	0	1	5	0	0	0	0	0	0	0	1	0
6	0.1.10.1.3.10.1	unclassified	0	255	0	0	0	0	3	0	0	0	0	0	0	0	245	0	0	1	5	0	0	0	0	0	0	0	1	0
5	0.1.10.1.3.3	Bradyrhizobiaceae	3	343	0	0	1	0	0	0	1	1	0	1	1	0	325	1	1	0	6	0	0	1	0	0	1	0	1	2
6	0.1.10.1.3.3.2	Bosea	0	29	0	0	0	0	0	0	0	0	0	0	0	0	29	0	0	0	0	0	0	0	0	0	0	0	0	0
6	0.1.10.1.3.3.3	Bradyrhizobium	0	313	0	0	1	0	0	0	1	0	0	1	1	0	296	1	1	0	6	0	0	1	0	0	1	0	1	2
5	0.1.10.1.3.4	Brucellaceae	1	9	0	0	0	0	0	0	0	0	0	0	0	0	9	0	0	0	0	0	0	0	0	0	0	0	0	0
6	0.1.10.1.3.4.1	Ochrobactrum	0	9	0	0	0	0	0	0	0	0	0	0	0	0	9	0	0	0	0	0	0	0	0	0	0	0	0	0
5	0.1.10.1.3.5	Hyphomicrobiaceae	2	173	0	1	0	1	0	0	0	0	0	0	0	0	169	0	0	0	1	0	0	0	0	0	0	1	0	0
6	0.1.10.1.3.5.1	Devosia	0	101	0	0	0	0	0	0	0	0	0	0	0	0	99	0	0	0	1	0	0	0	0	0	0	1	0	0
6	0.1.10.1.3.5.2	unclassified	0	72	0	1	0	1	0	0	0	0	0	0	0	0	70	0	0	0	0	0	0	0	0	0	0	0	0	0
5	0.1.10.1.3.6	Methylobacteriaceae	3	573	0	1	0	1	3	0	0	0	0	1	0	0	567	0	0	0	0	0	0	0	0	0	0	0	0	0
6	0.1.10.1.3.6.1	Methylobacterium	0	485	0	1	0	1	3	0	0	0	0	1	0	0	479	0	0	0	0	0	0	0	0	0	0	0	0	0
6	0.1.10.1.3.6.2	Microvirga	0	48	0	0	0	0	0	0	0	0	0	0	0	0	48	0	0	0	0	0	0	0	0	0	0	0	0	0
6	0.1.10.1.3.6.3	unclassified	0	40	0	0	0	0	0	0	0	0	0	0	0	0	40	0	0	0	0	0	0	0	0	0	0	0	0	0
5	0.1.10.1.3.7	Methylocystaceae	1	248	0	0	0	0	0	0	0	0	0	0	0	0	248	0	0	0	0	0	0	0	0	0	0	0	0	0
6	0.1.10.1.3.7.1	Methylocystis	0	248	0	0	0	0	0	0	0	0	0	0	0	0	248	0	0	0	0	0	0	0	0	0	0	0	0	0
5	0.1.10.1.3.8	Phyllobacteriaceae	2	372	0	0	0	0	0	0	0	0	0	0	0	0	372	0	0	0	0	0	0	0	0	0	0	0	0	0
6	0.1.10.1.3.8.1	Mesorhizobium	0	30	0	0	0	0	0	0	0	0	0	0	0	0	30	0	0	0	0	0	0	0	0	0	0	0	0	0
6	0.1.10.1.3.8.2	unclassified	0	342	0	0	0	0	0	0	0	0	0	0	0	0	342	0	0	0	0	0	0	0	0	0	0	0	0	0
5	0.1.10.1.3.9	Rhizobiaceae	2	318	1	0	0	3	0	1	0	0	0	0	0	1	303	2	0	0	3	0	1	1	0	0	0	0	2	0
6	0.1.10.1.3.9.1	Ensifer	0	30	0	0	0	0	0	0	0	0	0	0	0	0	30	0	0	0	0	0	0	0	0	0	0	0	0	0
6	0.1.10.1.3.9.2	Rhizobium	0	288	1	0	0	3	0	1	0	0	0	0	0	1	273	2	0	0	3	0	1	1	0	0	0	0	2	0
4	0.1.10.1.4	Rhodobacterales	1	815	0	1	0	2	0	0	1	0	1	2	0	0	805	0	0	0	2	0	0	0	0	0	1	0	0	0
5	0.1.10.1.4.1	Rhodobacteraceae	4	815	0	1	0	2	0	0	1	0	1	2	0	0	805	0	0	0	2	0	0	0	0	0	1	0	0	0
6	0.1.10.1.4.1.1	Paracoccus	0	443	0	1	0	2	0	0	0	0	0	1	0	0	436	0	0	0	2	0	0	0	0	0	1	0	0	0
6	0.1.10.1.4.1.2	Rhodobacter	0	116	0	0	0	0	0	0	0	0	0	0	0	0	116	0	0	0	0	0	0	0	0	0	0	0	0	0
6	0.1.10.1.4.1.3	Rubellimicrobium	0	106	0	0	0	0	0	0	0	0	0	0	0	0	106	0	0	0	0	0	0	0	0	0	0	0	0	0
6	0.1.10.1.4.1.4	unclassified	0	150	0	0	0	0	0	0	1	0	1	1	0	0	147	0	0	0	0	0	0	0	0	0	0	0	0	0
4	0.1.10.1.5	Rhodospirillales	1	92	0	0	0	0	0	0	0	0	0	1	0	0	88	0	0	0	2	0	1	0	0	0	0	0	0	0
5	0.1.10.1.5.1	Acetobacteraceae	3	92	0	0	0	0	0	0	0	0	0	1	0	0	88	0	0	0	2	0	1	0	0	0	0	0	0	0
6	0.1.10.1.5.1.2	Roseomonas	0	20	0	0	0	0	0	0	0	0	0	1	0	0	19	0	0	0	0	0	0	0	0	0	0	0	0	0
6	0.1.10.1.5.1.3	unclassified	0	70	0	0	0	0	0	0	0	0	0	0	0	0	69	0	0	0	0	0	1	0	0	0	0	0	0	0
4	0.1.10.1.6	Sphingomonadales	3	14739	21	88	28	187	131	162	153	9	11	11	31	33	11529	69	20	57	964	798	98	175	8	8	15	16	92	25
5	0.1.10.1.6.1	Erythrobacteraceae	4	551	0	0	1	3	1	0	0	1	0	0	0	0	538	0	0	0	5	1	0	1	0	0	0	0	0	0
6	0.1.10.1.6.1.2	Erythrobacter	0	481	0	0	1	3	0	0	0	0	0	0	0	0	475	0	0	0	1	1	0	0	0	0	0	0	0	0
6	0.1.10.1.6.1.3	Porphyrobacter	0	20	0	0	0	0	0	0	0	0	0	0	0	0	17	0	0	0	3	0	0	0	0	0	0	0	0	0
6	0.1.10.1.6.1.4	unclassified	0	49	0	0	0	0	1	0	0	1	0	0	0	0	46	0	0	0	0	0	0	1	0	0	0	0	0	0
5	0.1.10.1.6.2	Sphingomonadaceae	5	13942	21	88	27	183	130	161	153	8	11	11	31	33	10747	69	20	57	959	797	98	174	8	8	15	16	92	25
6	0.1.10.1.6.2.1	Novosphingobium	0	83	0	0	0	0	0	0	0	0	0	0	0	0	83	0	0	0	0	0	0	0	0	0	0	0	0	0
6	0.1.10.1.6.2.2	Sphingobium	0	37	0	0	0	0	0	0	0	0	0	0	0	0	37	0	0	0	0	0	0	0	0	0	0	0	0	0
6	0.1.10.1.6.2.3	Sphingomonas	0	13392	21	88	27	177	129	159	153	8	10	10	31	33	10212	69	20	56	959	797	98	174	8	8	14	16	90	25
6	0.1.10.1.6.2.4	Sphingopyxis	0	212	0	0	0	0	0	1	0	0	0	0	0	0	209	0	0	0	0	0	0	0	0	0	0	0	2	0
6	0.1.10.1.6.2.5	unclassified	0	218	0	0	0	6	1	1	0	0	1	1	0	0	206	0	0	1	0	0	0	0	0	0	1	0	0	0
5	0.1.10.1.6.3	unclassified	1	246	0	0	0	1	0	1	0	0	0	0	0	0	244	0	0	0	0	0	0	0	0	0	0	0	0	0
6	0.1.10.1.6.3.1	unclassified	0	246	0	0	0	1	0	1	0	0	0	0	0	0	244	0	0	0	0	0	0	0	0	0	0	0	0	0
4	0.1.10.1.7	unclassified	1	168	0	0	0	0	0	0	0	0	1	0	0	0	158	1	0	0	5	0	0	3	0	0	0	0	0	0
5	0.1.10.1.7.1	unclassified	1	168	0	0	0	0	0	0	0	0	1	0	0	0	158	1	0	0	5	0	0	3	0	0	0	0	0	0
6	0.1.10.1.7.1.1	unclassified	0	168	0	0	0	0	0	0	0	0	1	0	0	0	158	1	0	0	5	0	0	3	0	0	0	0	0	0
3	0.1.10.2	Betaproteobacteria	5	247786	16	1231	8	894	7052	1670	149	210	44	1094	2473	1094	117817	53	9276	155	68813	1483	173	16029	46	160	725	3517	12088	1516
4	0.1.10.2.1	Burkholderiales	7	17070	2	233	2	25	317	11	3	10	2	217	34	7	12957	7	972	2	644	13	21	1413	0	2	44	2	45	85
5	0.1.10.2.1.1	Alcaligenaceae	3	12	0	0	0	0	0	1	0	0	0	2	0	0	8	0	0	0	0	0	0	0	0	0	1	0	0	0
6	0.1.10.2.1.1.3	unclassified	0	8	0	0	0	0	0	1	0	0	0	0	0	0	7	0	0	0	0	0	0	0	0	0	0	0	0	0
5	0.1.10.2.1.2	Burkholderiaceae	3	145	0	0	1	1	1	0	1	0	0	1	0	0	110	0	0	2	28	0	0	0	0	0	0	0	0	0
6	0.1.10.2.1.2.1	Burkholderia	0	33	0	0	1	0	1	0	1	0	0	1	0	0	0	0	0	2	27	0	0	0	0	0	0	0	0	0
6	0.1.10.2.1.2.2	Polynucleobacter	0	110	0	0	0	0	0	0	0	0	0	0	0	0	110	0	0	0	0	0	0	0	0	0	0	0	0	0
5	0.1.10.2.1.3	Burkholderiales_incertae_sedis	2	65	0	0	0	0	0	1	0	0	0	0	0	0	64	0	0	0	0	0	0	0	0	0	0	0	0	0
6	0.1.10.2.1.3.1	Aquabacterium	0	52	0	0	0	0	0	1	0	0	0	0	0	0	51	0	0	0	0	0	0	0	0	0	0	0	0	0
6	0.1.10.2.1.3.2	Inhella	0	13	0	0	0	0	0	0	0	0	0	0	0	0	13	0	0	0	0	0	0	0	0	0	0	0	0	0
5	0.1.10.2.1.4	Comamonadaceae	11	1444	0	1	0	3	58	1	1	1	0	152	2	0	1195	2	9	0	9	2	0	5	0	0	0	1	1	1
6	0.1.10.2.1.4.1	Acidovorax	0	299	0	0	0	0	0	0	0	0	0	0	0	0	299	0	0	0	0	0	0	0	0	0	0	0	0	0
6	0.1.10.2.1.4.11	unclassified	0	615	0	0	0	0	1	0	1	0	0	0	1	0	610	0	1	0	1	0	0	0	0	0	0	0	0	0
6	0.1.10.2.1.4.2	Brachymonas	0	304	0	1	0	0	56	0	0	1	0	150	1	0	74	0	7	0	6	0	0	5	0	0	0	1	1	1
6	0.1.10.2.1.4.3	Comamonas	0	57	0	0	0	0	0	0	0	0	0	0	0	0	54	1	0	0	0	2	0	0	0	0	0	0	0	0
6	0.1.10.2.1.4.5	Delftia	0	118	0	0	0	0	0	1	0	0	0	1	0	0	112	1	1	0	2	0	0	0	0	0	0	0	0	0
6	0.1.10.2.1.4.6	Hydrogenophaga	0	4	0	0	0	0	0	0	0	0	0	0	0	0	4	0	0	0	0	0	0	0	0	0	0	0	0	0
6	0.1.10.2.1.4.9	Schlegelella	0	42	0	0	0	0	0	0	0	0	0	0	0	0	42	0	0	0	0	0	0	0	0	0	0	0	0	0
5	0.1.10.2.1.5	Oxalobacteraceae	5	265	0	0	1	2	0	0	0	0	1	1	0	0	257	0	0	0	3	0	0	0	0	0	0	0	0	0
6	0.1.10.2.1.5.2	Massilia	0	55	0	0	0	2	0	0	0	0	1	0	0	0	51	0	0	0	1	0	0	0	0	0	0	0	0	0
6	0.1.10.2.1.5.3	Naxibacter	0	20	0	0	0	0	0	0	0	0	0	1	0	0	19	0	0	0	0	0	0	0	0	0	0	0	0	0
6	0.1.10.2.1.5.4	Undibacterium	0	29	0	0	0	0	0	0	0	0	0	0	0	0	29	0	0	0	0	0	0	0	0	0	0	0	0	0
6	0.1.10.2.1.5.5	unclassified	0	160	0	0	1	0	0	0	0	0	0	0	0	0	157	0	0	0	2	0	0	0	0	0	0	0	0	0
5	0.1.10.2.1.7	unclassified	1	15137	2	232	0	19	258	8	1	9	1	61	32	7	11321	5	963	0	604	11	21	1408	0	2	43	1	44	84
6	0.1.10.2.1.7.1	unclassified	0	15137	2	232	0	19	258	8	1	9	1	61	32	7	11321	5	963	0	604	11	21	1408	0	2	43	1	44	84
4	0.1.10.2.2	Hydrogenophilales	1	154	0	0	0	0	0	0	0	0	0	0	0	0	154	0	0	0	0	0	0	0	0	0	0	0	0	0
5	0.1.10.2.2.1	Hydrogenophilaceae	1	154	0	0	0	0	0	0	0	0	0	0	0	0	154	0	0	0	0	0	0	0	0	0	0	0	0	0
6	0.1.10.2.2.1.1	Hydrogenophilus	0	154	0	0	0	0	0	0	0	0	0	0	0	0	154	0	0	0	0	0	0	0	0	0	0	0	0	0
4	0.1.10.2.3	Neisseriales	1	230197	14	998	5	869	6733	1659	146	200	42	876	2439	1086	104362	46	8303	153	68159	1470	152	14612	46	158	681	3515	12043	1430
5	0.1.10.2.3.1	Neisseriaceae	4	230197	14	998	5	869	6733	1659	146	200	42	876	2439	1086	104362	46	8303	153	68159	1470	152	14612	46	158	681	3515	12043	1430
6	0.1.10.2.3.1.1	Kingella	0	1903	1	4	0	0	7	1644	2	15	1	0	1	1	108	3	5	0	41	5	3	38	0	0	5	0	2	17
6	0.1.10.2.3.1.2	Neisseria	0	226446	13	964	5	869	6711	10	143	182	41	848	2428	1084	103088	43	8264	151	67754	1454	144	14443	45	158	670	3511	12016	1407
6	0.1.10.2.3.1.4	unclassified	0	1847	0	30	0	0	15	5	1	3	0	27	10	1	1166	0	34	2	364	11	5	131	1	0	6	4	25	6
4	0.1.10.2.4	Rhodocyclales	1	118	0	0	1	0	0	0	0	0	0	1	0	1	114	0	0	0	1	0	0	0	0	0	0	0	0	0
5	0.1.10.2.4.1	Rhodocyclaceae	5	118	0	0	1	0	0	0	0	0	0	1	0	1	114	0	0	0	1	0	0	0	0	0	0	0	0	0
6	0.1.10.2.4.1.1	Propionivibrio	0	9	0	0	0	0	0	0	0	0	0	0	0	0	9	0	0	0	0	0	0	0	0	0	0	0	0	0
6	0.1.10.2.4.1.2	Shinella	0	33	0	0	0	0	0	0	0	0	0	0	0	0	33	0	0	0	0	0	0	0	0	0	0	0	0	0
6	0.1.10.2.4.1.5	unclassified	0	74	0	0	1	0	0	0	0	0	0	0	0	1	72	0	0	0	0	0	0	0	0	0	0	0	0	0
4	0.1.10.2.5	unclassified	1	247	0	0	0	0	2	0	0	0	0	0	0	0	230	0	1	0	9	0	0	4	0	0	0	0	0	1
5	0.1.10.2.5.1	unclassified	1	247	0	0	0	0	2	0	0	0	0	0	0	0	230	0	1	0	9	0	0	4	0	0	0	0	0	1
6	0.1.10.2.5.1.1	unclassified	0	247	0	0	0	0	2	0	0	0	0	0	0	0	230	0	1	0	9	0	0	4	0	0	0	0	0	1
3	0.1.10.3	Deltaproteobacteria	4	419	0	0	0	1	1	0	0	0	0	0	0	0	378	0	2	0	12	1	0	23	0	0	0	0	0	1
4	0.1.10.3.1	Desulfobacterales	1	24	0	0	0	0	0	0	0	0	0	0	0	0	18	0	0	0	5	0	0	1	0	0	0	0	0	0
5	0.1.10.3.1.1	Desulfobulbaceae	1	24	0	0	0	0	0	0	0	0	0	0	0	0	18	0	0	0	5	0	0	1	0	0	0	0	0	0
6	0.1.10.3.1.1.1	Desulfobulbus	0	24	0	0	0	0	0	0	0	0	0	0	0	0	18	0	0	0	5	0	0	1	0	0	0	0	0	0
4	0.1.10.3.2	Desulfovibrionales	3	31	0	0	0	0	0	0	0	0	0	0	0	0	0	0	1	0	6	1	0	22	0	0	0	0	0	1
5	0.1.10.3.2.1	Desulfomicrobiaceae	1	7	0	0	0	0	0	0	0	0	0	0	0	0	0	0	1	0	0	1	0	4	0	0	0	0	0	1
6	0.1.10.3.2.1.1	Desulfomicrobium	0	7	0	0	0	0	0	0	0	0	0	0	0	0	0	0	1	0	0	1	0	4	0	0	0	0	0	1
5	0.1.10.3.2.2	Desulfovibrionaceae	1	7	0	0	0	0	0	0	0	0	0	0	0	0	0	0	0	0	0	0	0	7	0	0	0	0	0	0
6	0.1.10.3.2.2.1	Desulfovibrio	0	7	0	0	0	0	0	0	0	0	0	0	0	0	0	0	0	0	0	0	0	7	0	0	0	0	0	0
5	0.1.10.3.2.3	unclassified	1	17	0	0	0	0	0	0	0	0	0	0	0	0	0	0	0	0	6	0	0	11	0	0	0	0	0	0
6	0.1.10.3.2.3.1	unclassified	0	17	0	0	0	0	0	0	0	0	0	0	0	0	0	0	0	0	6	0	0	11	0	0	0	0	0	0
4	0.1.10.3.3	Desulfuromonadales	1	45	0	0	0	0	0	0	0	0	0	0	0	0	45	0	0	0	0	0	0	0	0	0	0	0	0	0
5	0.1.10.3.3.1	Geobacteraceae	1	45	0	0	0	0	0	0	0	0	0	0	0	0	45	0	0	0	0	0	0	0	0	0	0	0	0	0
6	0.1.10.3.3.1.1	Geobacter	0	45	0	0	0	0	0	0	0	0	0	0	0	0	45	0	0	0	0	0	0	0	0	0	0	0	0	0
4	0.1.10.3.4	Myxococcales	5	319	0	0	0	1	1	0	0	0	0	0	0	0	315	0	1	0	1	0	0	0	0	0	0	0	0	0
5	0.1.10.3.4.1	Cystobacteraceae	1	37	0	0	0	0	1	0	0	0	0	0	0	0	36	0	0	0	0	0	0	0	0	0	0	0	0	0
6	0.1.10.3.4.1.1	Cystobacter	0	37	0	0	0	0	1	0	0	0	0	0	0	0	36	0	0	0	0	0	0	0	0	0	0	0	0	0
5	0.1.10.3.4.2	Myxococcaceae	1	49	0	0	0	0	0	0	0	0	0	0	0	0	49	0	0	0	0	0	0	0	0	0	0	0	0	0
6	0.1.10.3.4.2.1	Corallococcus	0	49	0	0	0	0	0	0	0	0	0	0	0	0	49	0	0	0	0	0	0	0	0	0	0	0	0	0
5	0.1.10.3.4.3	Phaselicystidaceae	1	22	0	0	0	0	0	0	0	0	0	0	0	0	22	0	0	0	0	0	0	0	0	0	0	0	0	0
6	0.1.10.3.4.3.1	Phaselicystis	0	22	0	0	0	0	0	0	0	0	0	0	0	0	22	0	0	0	0	0	0	0	0	0	0	0	0	0
5	0.1.10.3.4.4	Polyangiaceae	3	59	0	0	0	1	0	0	0	0	0	0	0	0	57	0	1	0	0	0	0	0	0	0	0	0	0	0
6	0.1.10.3.4.4.2	Chondromyces	0	42	0	0	0	0	0	0	0	0	0	0	0	0	42	0	0	0	0	0	0	0	0	0	0	0	0	0
6	0.1.10.3.4.4.3	unclassified	0	15	0	0	0	0	0	0	0	0	0	0	0	0	15	0	0	0	0	0	0	0	0	0	0	0	0	0
5	0.1.10.3.4.5	unclassified	1	152	0	0	0	0	0	0	0	0	0	0	0	0	151	0	0	0	1	0	0	0	0	0	0	0	0	0
6	0.1.10.3.4.5.1	unclassified	0	152	0	0	0	0	0	0	0	0	0	0	0	0	151	0	0	0	1	0	0	0	0	0	0	0	0	0
3	0.1.10.4	Epsilonproteobacteria	2	3873	0	5	1	0	4	266	0	1	0	0	4	5	1931	41	76	20	406	47	30	376	1	8	139	17	380	115
4	0.1.10.4.1	Campylobacterales	2	3862	0	5	1	0	4	266	0	1	0	0	4	5	1931	41	76	20	406	47	30	365	1	8	139	17	380	115
5	0.1.10.4.1.1	Campylobacteraceae	2	3715	0	5	1	0	4	266	0	1	0	0	4	5	1817	39	76	20	401	47	30	343	1	8	139	17	380	111
6	0.1.10.4.1.1.1	Arcobacter	0	15	0	0	0	0	0	0	0	0	0	0	0	0	15	0	0	0	0	0	0	0	0	0	0	0	0	0
6	0.1.10.4.1.1.2	Campylobacter	0	3700	0	5	1	0	4	266	0	1	0	0	4	5	1802	39	76	20	401	47	30	343	1	8	139	17	380	111
5	0.1.10.4.1.2	Helicobacteraceae	1	147	0	0	0	0	0	0	0	0	0	0	0	0	114	2	0	0	5	0	0	22	0	0	0	0	0	4
6	0.1.10.4.1.2.1	Wolinella	0	147	0	0	0	0	0	0	0	0	0	0	0	0	114	2	0	0	5	0	0	22	0	0	0	0	0	4
4	0.1.10.4.2	unclassified	1	11	0	0	0	0	0	0	0	0	0	0	0	0	0	0	0	0	0	0	0	11	0	0	0	0	0	0
5	0.1.10.4.2.1	unclassified	1	11	0	0	0	0	0	0	0	0	0	0	0	0	0	0	0	0	0	0	0	11	0	0	0	0	0	0
6	0.1.10.4.2.1.1	unclassified	0	11	0	0	0	0	0	0	0	0	0	0	0	0	0	0	0	0	0	0	0	11	0	0	0	0	0	0
3	0.1.10.5	Gammaproteobacteria	14	229128	83	740	27	4694	9529	734	99	64	76	1108	1630	1235	118288	62	9228	4351	47763	1669	223	14737	126	254	629	1432	8445	1902
4	0.1.10.5.1	Enterobacteriales	1	5754	5	4	2	2	3	1	2	0	2	2	1	1	5704	2	7	1	3	0	1	4	0	0	2	0	0	5
5	0.1.10.5.1.1	Enterobacteriaceae	4	5754	5	4	2	2	3	1	2	0	2	2	1	1	5704	2	7	1	3	0	1	4	0	0	2	0	0	5
6	0.1.10.5.1.1.1	Escherichia_Shigella	0	174	2	2	1	0	2	1	2	0	0	1	0	1	152	0	2	1	0	0	1	4	0	0	2	0	0	0
6	0.1.10.5.1.1.2	Pantoea	0	474	3	1	1	0	1	0	0	0	0	1	0	0	463	0	2	0	2	0	0	0	0	0	0	0	0	0
6	0.1.10.5.1.1.3	Proteus	0	15	0	0	0	0	0	0	0	0	0	0	0	0	13	2	0	0	0	0	0	0	0	0	0	0	0	0
6	0.1.10.5.1.1.4	unclassified	0	5091	0	1	0	2	0	0	0	0	2	0	1	0	5076	0	3	0	1	0	0	0	0	0	0	0	0	5
4	0.1.10.5.10	Pasteurellales	1	207291	71	487	20	4676	9515	720	94	59	72	1083	1618	1223	99934	55	9213	4343	46471	1603	212	14215	125	248	622	1356	7436	1820
5	0.1.10.5.10.1	Pasteurellaceae	5	207291	71	487	20	4676	9515	720	94	59	72	1083	1618	1223	99934	55	9213	4343	46471	1603	212	14215	125	248	622	1356	7436	1820
6	0.1.10.5.10.1.1	Actinobacillus	0	19449	1	10	0	1	2	1	0	1	0	2	0	0	12978	0	0	0	6214	10	1	184	0	2	1	0	3	38
6	0.1.10.5.10.1.2	Aggregatibacter	0	787	0	1	0	0	0	497	0	0	0	0	0	0	37	9	34	0	86	2	8	43	0	0	0	1	2	67
6	0.1.10.5.10.1.3	Haemophilus	0	17426	62	129	0	25	1710	208	43	15	61	91	1	11	8074	11	262	3	1381	232	120	3821	2	1	102	42	241	778
6	0.1.10.5.10.1.5	unclassified	0	169628	8	347	20	4650	7803	14	51	43	11	990	1617	1212	78845	35	8917	4340	38790	1359	83	10166	123	245	519	1313	7190	937
4	0.1.10.5.11	Pseudomonadales	2	8598	2	229	0	5	0	2	1	0	1	20	0	2	5544	0	2	2	1186	47	0	456	0	4	0	72	979	44
5	0.1.10.5.11.1	Moraxellaceae	6	8229	0	229	0	5	0	2	0	0	1	16	0	2	5187	0	1	2	1184	45	0	456	0	4	0	72	979	44
6	0.1.10.5.11.1.1	Acinetobacter	0	4172	0	1	0	3	0	0	0	0	0	7	0	0	4152	0	0	1	3	0	0	4	0	0	0	0	0	1
6	0.1.10.5.11.1.2	Alkanindiges	0	121	0	1	0	0	0	0	0	0	0	0	0	0	120	0	0	0	0	0	0	0	0	0	0	0	0	0
6	0.1.10.5.11.1.3	Enhydrobacter	0	77	0	1	0	0	0	2	0	0	0	0	0	0	73	0	0	0	1	0	0	0	0	0	0	0	0	0
6	0.1.10.5.11.1.4	Moraxella	0	3729	0	225	0	2	0	0	0	0	1	9	0	2	727	0	1	1	1170	45	0	448	0	4	0	72	979	43
6	0.1.10.5.11.1.5	Psychrobacter	0	115	0	0	0	0	0	0	0	0	0	0	0	0	115	0	0	0	0	0	0	0	0	0	0	0	0	0
6	0.1.10.5.11.1.6	unclassified	0	15	0	1	0	0	0	0	0	0	0	0	0	0	0	0	0	0	10	0	0	4	0	0	0	0	0	0
5	0.1.10.5.11.2	Pseudomonadaceae	3	369	2	0	0	0	0	0	1	0	0	4	0	0	357	0	1	0	2	2	0	0	0	0	0	0	0	0
6	0.1.10.5.11.2.1	Cellvibrio	0	40	0	0	0	0	0	0	0	0	0	0	0	0	40	0	0	0	0	0	0	0	0	0	0	0	0	0
6	0.1.10.5.11.2.2	Pseudomonas	0	197	2	0	0	0	0	0	1	0	0	4	0	0	185	0	1	0	2	2	0	0	0	0	0	0	0	0
6	0.1.10.5.11.2.3	unclassified	0	132	0	0	0	0	0	0	0	0	0	0	0	0	132	0	0	0	0	0	0	0	0	0	0	0	0	0
4	0.1.10.5.12	Thiotrichales	1	25	0	0	0	0	0	0	0	0	0	0	0	0	25	0	0	0	0	0	0	0	0	0	0	0	0	0
5	0.1.10.5.12.1	Thiotrichaceae	1	25	0	0	0	0	0	0	0	0	0	0	0	0	25	0	0	0	0	0	0	0	0	0	0	0	0	0
6	0.1.10.5.12.1.1	Thiothrix	0	25	0	0	0	0	0	0	0	0	0	0	0	0	25	0	0	0	0	0	0	0	0	0	0	0	0	0
4	0.1.10.5.13	Xanthomonadales	1	2809	4	11	5	11	8	7	2	1	1	1	9	7	2638	4	2	4	29	19	7	6	1	1	1	1	20	9
5	0.1.10.5.13.1	Xanthomonadaceae	8	2809	4	11	5	11	8	7	2	1	1	1	9	7	2638	4	2	4	29	19	7	6	1	1	1	1	20	9
6	0.1.10.5.13.1.1	Arenimonas	0	24	0	0	0	0	0	0	0	0	0	0	0	0	24	0	0	0	0	0	0	0	0	0	0	0	0	0
6	0.1.10.5.13.1.2	Dyella	0	21	0	0	0	0	0	0	0	0	0	0	0	0	21	0	0	0	0	0	0	0	0	0	0	0	0	0
6	0.1.10.5.13.1.4	Luteimonas	0	52	0	0	0	0	0	0	0	0	0	0	0	0	52	0	0	0	0	0	0	0	0	0	0	0	0	0
6	0.1.10.5.13.1.5	Lysobacter	0	50	0	0	0	2	0	0	1	0	0	0	0	0	44	0	0	0	3	0	0	0	0	0	0	0	0	0
6	0.1.10.5.13.1.6	Pseudoxanthomonas	0	49	0	0	0	0	0	1	0	0	0	0	0	0	47	0	0	0	1	0	0	0	0	0	0	0	0	0
6	0.1.10.5.13.1.7	Stenotrophomonas	0	2509	4	11	5	9	8	5	1	1	1	1	9	7	2348	4	2	4	25	19	7	6	1	1	1	1	19	9
6	0.1.10.5.13.1.8	unclassified	0	103	0	0	0	0	0	1	0	0	0	0	0	0	102	0	0	0	0	0	0	0	0	0	0	0	0	0
4	0.1.10.5.14	unclassified	1	542	0	1	0	0	0	0	0	0	0	1	1	0	538	0	0	0	1	0	0	0	0	0	0	0	0	0
5	0.1.10.5.14.1	unclassified	1	542	0	1	0	0	0	0	0	0	0	1	1	0	538	0	0	0	1	0	0	0	0	0	0	0	0	0
6	0.1.10.5.14.1.1	unclassified	0	542	0	1	0	0	0	0	0	0	0	1	1	0	538	0	0	0	1	0	0	0	0	0	0	0	0	0
4	0.1.10.5.2	Vibrionales	1	341	0	1	0	0	2	0	0	0	0	0	0	0	326	0	0	0	2	0	1	4	0	0	0	1	3	1
5	0.1.10.5.2.1	Vibrionaceae	3	341	0	1	0	0	2	0	0	0	0	0	0	0	326	0	0	0	2	0	1	4	0	0	0	1	3	1
6	0.1.10.5.2.1.2	Salinivibrio	0	328	0	0	0	0	0	0	0	0	0	0	0	0	326	0	0	0	0	0	0	1	0	0	0	0	0	1
6	0.1.10.5.2.1.3	Vibrio	0	12	0	1	0	0	2	0	0	0	0	0	0	0	0	0	0	0	2	0	1	3	0	0	0	0	3	0
4	0.1.10.5.3	Aeromonadales	2	1844	0	0	0	0	0	0	0	0	0	0	0	0	1842	1	1	0	0	0	0	0	0	0	0	0	0	0
5	0.1.10.5.3.1	Aeromonadaceae	1	1777	0	0	0	0	0	0	0	0	0	0	0	0	1775	1	1	0	0	0	0	0	0	0	0	0	0	0
6	0.1.10.5.3.1.1	Aeromonas	0	1777	0	0	0	0	0	0	0	0	0	0	0	0	1775	1	1	0	0	0	0	0	0	0	0	0	0	0
5	0.1.10.5.3.2	Succinivibrionaceae	1	67	0	0	0	0	0	0	0	0	0	0	0	0	67	0	0	0	0	0	0	0	0	0	0	0	0	0
6	0.1.10.5.3.2.1	Succinivibrio	0	67	0	0	0	0	0	0	0	0	0	0	0	0	67	0	0	0	0	0	0	0	0	0	0	0	0	0
4	0.1.10.5.4	Alteromonadales	3	359	0	0	0	0	0	0	0	0	0	0	0	0	359	0	0	0	0	0	0	0	0	0	0	0	0	0
5	0.1.10.5.4.1	Alteromonadaceae	1	10	0	0	0	0	0	0	0	0	0	0	0	0	10	0	0	0	0	0	0	0	0	0	0	0	0	0
6	0.1.10.5.4.1.1	Marinobacter	0	10	0	0	0	0	0	0	0	0	0	0	0	0	10	0	0	0	0	0	0	0	0	0	0	0	0	0
5	0.1.10.5.4.2	Idiomarinaceae	2	79	0	0	0	0	0	0	0	0	0	0	0	0	79	0	0	0	0	0	0	0	0	0	0	0	0	0
6	0.1.10.5.4.2.1	Idiomarina	0	76	0	0	0	0	0	0	0	0	0	0	0	0	76	0	0	0	0	0	0	0	0	0	0	0	0	0
6	0.1.10.5.4.2.2	unclassified	0	3	0	0	0	0	0	0	0	0	0	0	0	0	3	0	0	0	0	0	0	0	0	0	0	0	0	0
5	0.1.10.5.4.3	Shewanellaceae	1	270	0	0	0	0	0	0	0	0	0	0	0	0	270	0	0	0	0	0	0	0	0	0	0	0	0	0
6	0.1.10.5.4.3.1	Shewanella	0	270	0	0	0	0	0	0	0	0	0	0	0	0	270	0	0	0	0	0	0	0	0	0	0	0	0	0
4	0.1.10.5.5	Cardiobacteriales	1	975	1	0	0	0	1	4	0	2	0	0	1	2	805	0	3	1	68	0	2	52	0	1	3	2	4	23
5	0.1.10.5.5.1	Cardiobacteriaceae	2	975	1	0	0	0	1	4	0	2	0	0	1	2	805	0	3	1	68	0	2	52	0	1	3	2	4	23
6	0.1.10.5.5.1.1	Cardiobacterium	0	930	0	0	0	0	1	4	0	1	0	0	1	2	783	0	3	1	62	0	2	52	0	1	3	2	4	8
6	0.1.10.5.5.1.2	unclassified	0	45	1	0	0	0	0	0	0	1	0	0	0	0	22	0	0	0	6	0	0	0	0	0	0	0	0	15
4	0.1.10.5.6	Chromatiales	1	3	0	0	0	0	0	0	0	2	0	0	0	0	0	0	0	0	0	0	0	0	0	0	1	0	0	0
5	0.1.10.5.6.1	Chromatiaceae	1	3	0	0	0	0	0	0	0	2	0	0	0	0	0	0	0	0	0	0	0	0	0	0	1	0	0	0
6	0.1.10.5.6.1.1	Rheinheimera	0	3	0	0	0	0	0	0	0	2	0	0	0	0	0	0	0	0	0	0	0	0	0	0	1	0	0	0
4	0.1.10.5.8	Methylococcales	1	429	0	0	0	0	0	0	0	0	0	0	0	0	429	0	0	0	0	0	0	0	0	0	0	0	0	0
5	0.1.10.5.8.1	Methylococcaceae	4	429	0	0	0	0	0	0	0	0	0	0	0	0	429	0	0	0	0	0	0	0	0	0	0	0	0	0
6	0.1.10.5.8.1.1	Methylocaldum	0	4	0	0	0	0	0	0	0	0	0	0	0	0	4	0	0	0	0	0	0	0	0	0	0	0	0	0
6	0.1.10.5.8.1.2	Methylomonas	0	88	0	0	0	0	0	0	0	0	0	0	0	0	88	0	0	0	0	0	0	0	0	0	0	0	0	0
6	0.1.10.5.8.1.3	Methylovulum	0	31	0	0	0	0	0	0	0	0	0	0	0	0	31	0	0	0	0	0	0	0	0	0	0	0	0	0
6	0.1.10.5.8.1.4	unclassified	0	306	0	0	0	0	0	0	0	0	0	0	0	0	306	0	0	0	0	0	0	0	0	0	0	0	0	0
4	0.1.10.5.9	Oceanospirillales	1	157	0	7	0	0	0	0	0	0	0	1	0	0	144	0	0	0	2	0	0	0	0	0	0	0	3	0
5	0.1.10.5.9.1	Halomonadaceae	4	157	0	7	0	0	0	0	0	0	0	1	0	0	144	0	0	0	2	0	0	0	0	0	0	0	3	0
6	0.1.10.5.9.1.1	Halomonas	0	146	0	0	0	0	0	0	0	0	0	1	0	0	143	0	0	0	2	0	0	0	0	0	0	0	0	0
6	0.1.10.5.9.1.2	Kushneria	0	9	0	7	0	0	0	0	0	0	0	0	0	0	0	0	0	0	0	0	0	0	0	0	0	0	2	0
3	0.1.10.6	unclassified	1	165	0	0	0	1	0	0	0	0	0	0	0	1	51	1	1	0	4	1	0	100	0	0	0	0	0	5
4	0.1.10.6.1	unclassified	1	165	0	0	0	1	0	0	0	0	0	0	0	1	51	1	1	0	4	1	0	100	0	0	0	0	0	5
5	0.1.10.6.1.1	unclassified	1	165	0	0	0	1	0	0	0	0	0	0	0	1	51	1	1	0	4	1	0	100	0	0	0	0	0	5
6	0.1.10.6.1.1.1	unclassified	0	165	0	0	0	1	0	0	0	0	0	0	0	1	51	1	1	0	4	1	0	100	0	0	0	0	0	5
2	0.1.11	Spirochaetes	1	18103	0	1	0	0	2	20	0	0	0	0	2	0	15508	82	7	0	579	94	38	1514	5	4	19	8	29	191
3	0.1.11.1	Spirochaetes	1	18103	0	1	0	0	2	20	0	0	0	0	2	0	15508	82	7	0	579	94	38	1514	5	4	19	8	29	191
4	0.1.11.1.1	Spirochaetales	1	18103	0	1	0	0	2	20	0	0	0	0	2	0	15508	82	7	0	579	94	38	1514	5	4	19	8	29	191
5	0.1.11.1.1.1	Spirochaetaceae	2	18103	0	1	0	0	2	20	0	0	0	0	2	0	15508	82	7	0	579	94	38	1514	5	4	19	8	29	191
6	0.1.11.1.1.1.1	Treponema	0	18102	0	1	0	0	2	20	0	0	0	0	2	0	15508	82	7	0	579	94	38	1513	5	4	19	8	29	191
2	0.1.13	Tenericutes	1	276	0	0	0	0	0	0	0	0	0	0	0	0	230	0	1	0	31	0	2	9	0	0	0	0	0	3
3	0.1.13.1	Mollicutes	1	276	0	0	0	0	0	0	0	0	0	0	0	0	230	0	1	0	31	0	2	9	0	0	0	0	0	3
4	0.1.13.1.1	Mycoplasmatales	1	276	0	0	0	0	0	0	0	0	0	0	0	0	230	0	1	0	31	0	2	9	0	0	0	0	0	3
5	0.1.13.1.1.1	Mycoplasmataceae	1	276	0	0	0	0	0	0	0	0	0	0	0	0	230	0	1	0	31	0	2	9	0	0	0	0	0	3
6	0.1.13.1.1.1.1	Mycoplasma	0	276	0	0	0	0	0	0	0	0	0	0	0	0	230	0	1	0	31	0	2	9	0	0	0	0	0	3
2	0.1.14	Verrucomicrobia	5	247	0	0	0	0	0	0	0	0	0	0	0	0	244	0	2	0	0	0	0	0	0	0	0	0	1	0
3	0.1.14.1	Opitutae	1	161	0	0	0	0	0	0	0	0	0	0	0	0	161	0	0	0	0	0	0	0	0	0	0	0	0	0
4	0.1.14.1.1	Opitutales	1	161	0	0	0	0	0	0	0	0	0	0	0	0	161	0	0	0	0	0	0	0	0	0	0	0	0	0
5	0.1.14.1.1.1	Opitutaceae	1	161	0	0	0	0	0	0	0	0	0	0	0	0	161	0	0	0	0	0	0	0	0	0	0	0	0	0
6	0.1.14.1.1.1.1	Opitutus	0	161	0	0	0	0	0	0	0	0	0	0	0	0	161	0	0	0	0	0	0	0	0	0	0	0	0	0
3	0.1.14.2	Spartobacteria	1	4	0	0	0	0	0	0	0	0	0	0	0	0	4	0	0	0	0	0	0	0	0	0	0	0	0	0
4	0.1.14.2.1	Spartobacteria_order_incertae_sedis	1	4	0	0	0	0	0	0	0	0	0	0	0	0	4	0	0	0	0	0	0	0	0	0	0	0	0	0
5	0.1.14.2.1.1	Spartobacteria_family_incertae_sedis	1	4	0	0	0	0	0	0	0	0	0	0	0	0	4	0	0	0	0	0	0	0	0	0	0	0	0	0
6	0.1.14.2.1.1.1	Spartobacteria_genera_incertae_sedis	0	4	0	0	0	0	0	0	0	0	0	0	0	0	4	0	0	0	0	0	0	0	0	0	0	0	0	0
3	0.1.14.3	Subdivision3	1	17	0	0	0	0	0	0	0	0	0	0	0	0	16	0	0	0	0	0	0	0	0	0	0	0	1	0
4	0.1.14.3.1	Subdivision3_order_incertae_sedis	1	17	0	0	0	0	0	0	0	0	0	0	0	0	16	0	0	0	0	0	0	0	0	0	0	0	1	0
5	0.1.14.3.1.1	Subdivision3_family_incertae_sedis	1	17	0	0	0	0	0	0	0	0	0	0	0	0	16	0	0	0	0	0	0	0	0	0	0	0	1	0
6	0.1.14.3.1.1.1	3_genus_incertae_sedis	0	17	0	0	0	0	0	0	0	0	0	0	0	0	16	0	0	0	0	0	0	0	0	0	0	0	1	0
3	0.1.14.4	Verrucomicrobiae	1	4	0	0	0	0	0	0	0	0	0	0	0	0	3	0	1	0	0	0	0	0	0	0	0	0	0	0
4	0.1.14.4.1	Verrucomicrobiales	1	4	0	0	0	0	0	0	0	0	0	0	0	0	3	0	1	0	0	0	0	0	0	0	0	0	0	0
5	0.1.14.4.1.1	Verrucomicrobiaceae	1	4	0	0	0	0	0	0	0	0	0	0	0	0	3	0	1	0	0	0	0	0	0	0	0	0	0	0
6	0.1.14.4.1.1.1	Luteolibacter	0	4	0	0	0	0	0	0	0	0	0	0	0	0	3	0	1	0	0	0	0	0	0	0	0	0	0	0
3	0.1.14.5	unclassified	1	61	0	0	0	0	0	0	0	0	0	0	0	0	60	0	1	0	0	0	0	0	0	0	0	0	0	0
4	0.1.14.5.1	unclassified	1	61	0	0	0	0	0	0	0	0	0	0	0	0	60	0	1	0	0	0	0	0	0	0	0	0	0	0
5	0.1.14.5.1.1	unclassified	1	61	0	0	0	0	0	0	0	0	0	0	0	0	60	0	1	0	0	0	0	0	0	0	0	0	0	0
6	0.1.14.5.1.1.1	unclassified	0	61	0	0	0	0	0	0	0	0	0	0	0	0	60	0	1	0	0	0	0	0	0	0	0	0	0	0
2	0.1.15	Firmicutes	5	1038571	11815	8594	8143	89185	121242	18697	28554	19050	2877	34460	18216	14756	166159	5548	42968	9506	84231	18350	3522	176291	1279	2021	25308	3358	101733	22708
3	0.1.15.1	Bacilli	3	1005707	11588	8339	7475	89173	119096	17268	28458	18812	2687	34456	17684	14271	162745	5004	41239	8436	82962	17687	3232	171421	1138	1906	22338	2917	93962	21413
4	0.1.15.1.1	Bacillales	12	114859	201	639	26	1954	1273	1101	2791	160	347	864	201	55	28739	548	1481	690	14213	4055	454	40874	171	136	778	436	11636	1036
5	0.1.15.1.1.1	Alicyclobacillaceae	1	197	0	0	0	0	0	0	0	0	0	2	0	0	195	0	0	0	0	0	0	0	0	0	0	0	0	0
6	0.1.15.1.1.1.1	Tumebacillus	0	197	0	0	0	0	0	0	0	0	0	2	0	0	195	0	0	0	0	0	0	0	0	0	0	0	0	0
5	0.1.15.1.1.10	Sporolactobacillaceae	1	68	0	0	0	1	0	0	0	0	0	0	0	0	67	0	0	0	0	0	0	0	0	0	0	0	0	0
6	0.1.15.1.1.10.1	Sporolactobacillaceae_incertae_sedis	0	68	0	0	0	1	0	0	0	0	0	0	0	0	67	0	0	0	0	0	0	0	0	0	0	0	0	0
5	0.1.15.1.1.11	Staphylococcaceae	5	5801	32	14	0	241	26	17	15	0	1	15	2	0	5377	4	0	0	21	12	0	11	0	0	1	0	3	9
6	0.1.15.1.1.11.1	Jeotgalicoccus	0	86	0	0	0	0	0	0	0	0	0	0	0	0	86	0	0	0	0	0	0	0	0	0	0	0	0	0
6	0.1.15.1.1.11.3	Salinicoccus	0	233	0	0	0	11	0	0	0	0	1	0	0	0	221	0	0	0	0	0	0	0	0	0	0	0	0	0
6	0.1.15.1.1.11.4	Staphylococcus	0	4663	32	14	0	216	22	17	15	0	0	15	2	0	4274	4	0	0	19	10	0	10	0	0	1	0	3	9
6	0.1.15.1.1.11.5	unclassified	0	817	0	0	0	14	4	0	0	0	0	0	0	0	795	0	0	0	1	2	0	1	0	0	0	0	0	0
5	0.1.15.1.1.12	unclassified	1	215	0	0	0	0	0	0	0	0	0	6	6	1	153	0	0	0	4	1	0	0	0	0	0	41	2	1
6	0.1.15.1.1.12.1	unclassified	0	215	0	0	0	0	0	0	0	0	0	6	6	1	153	0	0	0	4	1	0	0	0	0	0	41	2	1
5	0.1.15.1.1.2	Bacillaceae_1	4	171	1	3	2	6	1	5	3	1	0	8	0	0	112	2	7	2	4	0	3	6	3	1	1	0	0	0
6	0.1.15.1.1.2.1	Aeribacillus	0	12	0	0	0	0	0	0	0	0	0	0	0	0	12	0	0	0	0	0	0	0	0	0	0	0	0	0
6	0.1.15.1.1.2.2	Bacillus	0	130	1	3	2	6	1	5	3	1	0	7	0	0	72	2	7	2	4	0	3	6	3	1	1	0	0	0
6	0.1.15.1.1.2.3	Geobacillus	0	28	0	0	0	0	0	0	0	0	0	0	0	0	28	0	0	0	0	0	0	0	0	0	0	0	0	0
5	0.1.15.1.1.3	Bacillaceae_2	6	392	0	0	0	6	1	0	0	0	0	2	0	0	359	2	0	0	0	4	0	0	0	0	18	0	0	0
6	0.1.15.1.1.3.1	Alkalibacillus	0	14	0	0	0	0	0	0	0	0	0	2	0	0	0	2	0	0	0	0	0	0	0	0	10	0	0	0
6	0.1.15.1.1.3.2	Halobacillus	0	145	0	0	0	1	0	0	0	0	0	0	0	0	140	0	0	0	0	4	0	0	0	0	0	0	0	0
6	0.1.15.1.1.3.3	Marinococcus	0	195	0	0	0	4	1	0	0	0	0	0	0	0	190	0	0	0	0	0	0	0	0	0	0	0	0	0
6	0.1.15.1.1.3.5	Salimicrobium	0	23	0	0	0	0	0	0	0	0	0	0	0	0	15	0	0	0	0	0	0	0	0	0	8	0	0	0
6	0.1.15.1.1.3.6	unclassified	0	14	0	0	0	0	0	0	0	0	0	0	0	0	14	0	0	0	0	0	0	0	0	0	0	0	0	0
5	0.1.15.1.1.4	Bacillales_Incertae_Sedis_XI	1	103359	168	622	24	1551	1242	1078	2772	159	346	820	190	54	18002	540	1474	688	14176	4037	451	40853	168	134	758	395	11631	1026
6	0.1.15.1.1.4.1	Gemella	0	103359	168	622	24	1551	1242	1078	2772	159	346	820	190	54	18002	540	1474	688	14176	4037	451	40853	168	134	758	395	11631	1026
5	0.1.15.1.1.5	Bacillales_Incertae_Sedis_XII	1	1050	0	0	0	36	0	0	1	0	0	2	0	0	1006	0	0	0	4	0	0	1	0	0	0	0	0	0
6	0.1.15.1.1.5.1	Exiguobacterium	0	1050	0	0	0	36	0	0	1	0	0	2	0	0	1006	0	0	0	4	0	0	1	0	0	0	0	0	0
5	0.1.15.1.1.6	Paenibacillaceae_1	1	15	0	0	0	0	0	0	0	0	0	0	0	0	14	0	0	0	1	0	0	0	0	0	0	0	0	0
6	0.1.15.1.1.6.1	Brevibacillus	0	15	0	0	0	0	0	0	0	0	0	0	0	0	14	0	0	0	1	0	0	0	0	0	0	0	0	0
5	0.1.15.1.1.8	Pasteuriaceae	1	11	0	0	0	0	0	0	0	0	0	0	0	0	11	0	0	0	0	0	0	0	0	0	0	0	0	0
6	0.1.15.1.1.8.1	Pasteuria	0	11	0	0	0	0	0	0	0	0	0	0	0	0	11	0	0	0	0	0	0	0	0	0	0	0	0	0
5	0.1.15.1.1.9	Planococcaceae	3	3579	0	0	0	113	3	1	0	0	0	8	3	0	3443	0	0	0	3	1	0	3	0	1	0	0	0	0
6	0.1.15.1.1.9.1	Jeotgalibacillus	0	2683	0	0	0	97	2	0	0	0	0	2	1	0	2573	0	0	0	3	1	0	3	0	1	0	0	0	0
6	0.1.15.1.1.9.2	Planomicrobium	0	33	0	0	0	0	0	0	0	0	0	0	0	0	33	0	0	0	0	0	0	0	0	0	0	0	0	0
6	0.1.15.1.1.9.3	unclassified	0	863	0	0	0	16	1	1	0	0	0	6	2	0	837	0	0	0	0	0	0	0	0	0	0	0	0	0
4	0.1.15.1.2	Lactobacillales	7	890789	11387	7698	7448	87216	117812	16167	25666	18652	2340	33592	17482	14215	133989	4456	39755	7745	68747	13632	2778	130537	967	1770	21560	2481	82321	20376
5	0.1.15.1.2.1	Aerococcaceae	2	18846	0	6	0	7	855	0	12	24	3	54	14	3	7198	1	42	7	1589	169	27	8623	8	0	6	6	128	64
6	0.1.15.1.2.1.1	Abiotrophia	0	18817	0	6	0	7	855	0	12	24	3	54	14	3	7169	1	42	7	1589	169	27	8623	8	0	6	6	128	64
6	0.1.15.1.2.1.2	Aerococcus	0	29	0	0	0	0	0	0	0	0	0	0	0	0	29	0	0	0	0	0	0	0	0	0	0	0	0	0
5	0.1.15.1.2.2	Carnobacteriaceae	4	26568	110	440	0	1740	5203	633	201	29	53	387	18	70	5877	92	231	26	1176	1004	244	6291	12	10	63	23	741	1894
6	0.1.15.1.2.2.1	Alkalibacterium	0	126	0	0	0	0	0	0	0	0	0	0	0	0	126	0	0	0	0	0	0	0	0	0	0	0	0	0
6	0.1.15.1.2.2.2	Dolosigranulum	0	38	0	17	0	0	1	0	0	0	0	3	0	0	16	0	0	0	1	0	0	0	0	0	0	0	0	0
6	0.1.15.1.2.2.3	Granulicatella	0	26297	109	422	0	1728	5179	632	201	29	53	380	17	68	5704	92	226	25	1169	1004	244	6283	11	10	62	23	733	1893
6	0.1.15.1.2.2.4	unclassified	0	107	1	1	0	12	23	1	0	0	0	4	1	2	31	0	5	1	6	0	0	8	1	0	1	0	8	1
5	0.1.15.1.2.3	Enterococcaceae	3	77	0	2	0	0	4	0	0	4	0	2	0	0	60	1	0	0	1	0	0	2	0	0	0	0	1	0
6	0.1.15.1.2.3.1	Enterococcus	0	63	0	2	0	0	0	0	0	0	0	2	0	0	59	0	0	0	0	0	0	0	0	0	0	0	0	0
6	0.1.15.1.2.3.2	Vagococcus	0	3	0	0	0	0	0	0	0	0	0	0	0	0	0	1	0	0	1	0	0	1	0	0	0	0	0	0
6	0.1.15.1.2.3.3	unclassified	0	11	0	0	0	0	4	0	0	4	0	0	0	0	1	0	0	0	0	0	0	1	0	0	0	0	1	0
5	0.1.15.1.2.4	Lactobacillaceae	2	3320	0	0	0	9	0	0	2	0	0	2	0	1	614	31	78	1	37	126	25	2166	0	3	5	8	9	203
6	0.1.15.1.2.4.1	Lactobacillus	0	3318	0	0	0	9	0	0	2	0	0	2	0	1	612	31	78	1	37	126	25	2166	0	3	5	8	9	203
5	0.1.15.1.2.5	Leuconostocaceae	2	61	0	0	0	0	0	0	0	0	0	9	0	0	46	0	0	0	0	0	0	0	0	0	4	0	0	2
6	0.1.15.1.2.5.1	Leuconostoc	0	42	0	0	0	0	0	0	0	0	0	0	0	0	42	0	0	0	0	0	0	0	0	0	0	0	0	0
6	0.1.15.1.2.5.2	Weissella	0	19	0	0	0	0	0	0	0	0	0	9	0	0	4	0	0	0	0	0	0	0	0	0	4	0	0	2
5	0.1.15.1.2.6	Streptococcaceae	3	765433	10478	6674	7314	77924	95075	15166	24800	16079	2211	31259	16111	12814	97503	3675	35673	7109	62791	12035	2463	109902	817	1673	20138	2197	75869	17683
6	0.1.15.1.2.6.1	Lactococcus	0	32	0	0	0	0	0	0	0	0	0	0	0	0	32	0	0	0	0	0	0	0	0	0	0	0	0	0
6	0.1.15.1.2.6.2	Streptococcus	0	765393	10478	6674	7314	77921	95075	15165	24800	16079	2211	31259	16111	12813	97471	3675	35673	7109	62791	12035	2463	109901	817	1673	20138	2197	75867	17683
6	0.1.15.1.2.6.3	unclassified	0	8	0	0	0	3	0	1	0	0	0	0	0	1	0	0	0	0	0	0	0	1	0	0	0	0	2	0
5	0.1.15.1.2.7	unclassified	1	76484	799	576	134	7536	16675	368	651	2516	73	1879	1339	1327	22691	656	3731	602	3153	298	19	3553	130	84	1344	247	5573	530
6	0.1.15.1.2.7.1	unclassified	0	76484	799	576	134	7536	16675	368	651	2516	73	1879	1339	1327	22691	656	3731	602	3153	298	19	3553	130	84	1344	247	5573	530
4	0.1.15.1.3	unclassified	1	59	0	2	1	3	11	0	1	0	0	0	1	1	17	0	3	1	2	0	0	10	0	0	0	0	5	1
5	0.1.15.1.3.1	unclassified	1	59	0	2	1	3	11	0	1	0	0	0	1	1	17	0	3	1	2	0	0	10	0	0	0	0	5	1
6	0.1.15.1.3.1.1	unclassified	0	59	0	2	1	3	11	0	1	0	0	0	1	1	17	0	3	1	2	0	0	10	0	0	0	0	5	1
3	0.1.15.2	Clostridia	2	13586	13	23	2	0	83	204	6	26	22	0	179	64	2226	243	582	64	928	503	164	3999	116	57	38	348	3440	256
4	0.1.15.2.1	Clostridiales	10	13354	13	23	2	0	80	204	6	26	22	0	179	62	2209	240	582	63	925	478	161	3883	114	56	38	347	3405	236
5	0.1.15.2.1.1	Clostridiaceae_1	2	114	0	0	0	0	0	0	0	0	0	0	0	0	114	0	0	0	0	0	0	0	0	0	0	0	0	0
6	0.1.15.2.1.1.1	Clostridium_sensu_stricto	0	111	0	0	0	0	0	0	0	0	0	0	0	0	111	0	0	0	0	0	0	0	0	0	0	0	0	0
6	0.1.15.2.1.1.2	unclassified	0	3	0	0	0	0	0	0	0	0	0	0	0	0	3	0	0	0	0	0	0	0	0	0	0	0	0	0
5	0.1.15.2.1.10	unclassified	1	3264	0	16	0	0	28	92	4	18	4	0	108	34	504	103	207	11	212	138	25	1180	20	12	5	31	465	47
6	0.1.15.2.1.10.1	unclassified	0	3264	0	16	0	0	28	92	4	18	4	0	108	34	504	103	207	11	212	138	25	1180	20	12	5	31	465	47
5	0.1.15.2.1.3	Clostridiales_Incertae_Sedis_III	1	15	0	0	0	0	0	0	0	0	0	0	0	0	15	0	0	0	0	0	0	0	0	0	0	0	0	0
6	0.1.15.2.1.3.1	Thermoanaerobacterium	0	15	0	0	0	0	0	0	0	0	0	0	0	0	15	0	0	0	0	0	0	0	0	0	0	0	0	0
5	0.1.15.2.1.4	Clostridiales_Incertae_Sedis_XI	4	140	11	0	0	0	0	0	0	0	0	0	0	0	82	0	0	0	7	9	1	16	0	0	0	1	0	13
6	0.1.15.2.1.4.1	Anaerococcus	0	4	2	0	0	0	0	0	0	0	0	0	0	0	0	0	0	0	0	0	0	1	0	0	0	0	0	1
6	0.1.15.2.1.4.2	Finegoldia	0	7	7	0	0	0	0	0	0	0	0	0	0	0	0	0	0	0	0	0	0	0	0	0	0	0	0	0
6	0.1.15.2.1.4.3	Parvimonas	0	127	0	0	0	0	0	0	0	0	0	0	0	0	82	0	0	0	7	9	1	15	0	0	0	1	0	12
5	0.1.15.2.1.5	Clostridiales_Incertae_Sedis_XIII	3	200	0	0	0	0	0	0	0	0	0	0	0	0	15	1	12	1	1	5	1	57	1	1	0	9	90	6
6	0.1.15.2.1.5.2	Mogibacterium	0	158	0	0	0	0	0	0	0	0	0	0	0	0	15	1	12	1	1	5	1	44	1	1	0	7	65	4
6	0.1.15.2.1.5.3	unclassified	0	40	0	0	0	0	0	0	0	0	0	0	0	0	0	0	0	0	0	0	0	13	0	0	0	0	25	2
5	0.1.15.2.1.6	Eubacteriaceae	2	891	0	0	0	0	0	0	0	0	0	0	0	0	281	5	74	0	103	11	2	213	5	4	0	11	171	11
6	0.1.15.2.1.6.1	Eubacterium	0	852	0	0	0	0	0	0	0	0	0	0	0	0	281	5	74	0	102	8	2	183	5	4	0	8	169	11
6	0.1.15.2.1.6.2	Pseudoramibacter	0	39	0	0	0	0	0	0	0	0	0	0	0	0	0	0	0	0	1	3	0	30	0	0	0	3	2	0
5	0.1.15.2.1.7	Lachnospiraceae	10	7508	2	5	2	0	52	106	2	8	18	0	71	26	988	119	242	48	251	278	120	1973	82	38	33	284	2621	139
6	0.1.15.2.1.7.1	Blautia	0	13	0	0	0	0	0	0	0	0	0	0	0	0	13	0	0	0	0	0	0	0	0	0	0	0	0	0
6	0.1.15.2.1.7.10	unclassified	0	4165	2	4	1	0	50	46	2	8	17	0	24	26	384	71	46	24	89	187	76	752	53	33	29	230	1938	73
6	0.1.15.2.1.7.2	Butyrivibrio	0	26	0	0	0	0	0	0	0	0	0	0	0	0	0	0	0	0	0	3	0	7	1	0	0	5	10	0
6	0.1.15.2.1.7.3	Catonella	0	1097	0	1	0	0	0	1	0	0	0	0	0	0	400	10	35	0	79	22	14	374	8	1	2	4	131	15
6	0.1.15.2.1.7.4	Howardella	0	6	0	0	0	0	0	0	0	0	0	0	0	0	0	0	0	0	0	0	1	2	0	0	0	0	0	3
6	0.1.15.2.1.7.5	Johnsonella	0	150	0	0	0	0	0	0	0	0	0	0	0	0	71	2	0	0	47	6	0	21	0	1	0	0	1	1
6	0.1.15.2.1.7.7	Oribacterium	0	1821	0	0	0	0	0	59	0	0	1	0	47	0	82	34	161	24	30	55	23	664	17	3	2	44	539	36
6	0.1.15.2.1.7.8	Roseburia	0	30	0	0	0	0	0	0	0	0	0	0	0	0	30	0	0	0	0	0	0	0	0	0	0	0	0	0
6	0.1.15.2.1.7.9	Shuttleworthia	0	198	0	0	1	0	2	0	0	0	0	0	0	0	8	2	0	0	6	5	6	152	3	0	0	1	1	11
5	0.1.15.2.1.8	Peptostreptococcaceae	4	1207	0	2	0	0	0	6	0	0	0	0	0	2	210	12	47	3	351	36	12	430	6	1	0	11	58	20
6	0.1.15.2.1.8.1	Filifactor	0	754	0	0	0	0	0	0	0	0	0	0	0	0	200	10	0	0	309	11	2	204	1	0	0	1	3	13
6	0.1.15.2.1.8.2	Peptostreptococcaceae_incertae_sedis	0	186	0	2	0	0	0	2	0	0	0	0	0	2	10	0	29	3	22	9	1	94	0	0	0	1	10	1
6	0.1.15.2.1.8.3	Peptostreptococcus	0	255	0	0	0	0	0	4	0	0	0	0	0	0	0	0	18	0	20	16	9	131	5	1	0	9	36	6
6	0.1.15.2.1.8.4	unclassified	0	12	0	0	0	0	0	0	0	0	0	0	0	0	0	2	0	0	0	0	0	1	0	0	0	0	9	0
5	0.1.15.2.1.9	Syntrophomonadaceae	1	14	0	0	0	0	0	0	0	0	0	0	0	0	0	0	0	0	0	0	0	14	0	0	0	0	0	0
6	0.1.15.2.1.9.1	unclassified	0	14	0	0	0	0	0	0	0	0	0	0	0	0	0	0	0	0	0	0	0	14	0	0	0	0	0	0
4	0.1.15.2.2	unclassified	1	232	0	0	0	0	3	0	0	0	0	0	0	2	17	3	0	1	3	25	3	116	2	1	0	1	35	20
5	0.1.15.2.2.1	unclassified	1	232	0	0	0	0	3	0	0	0	0	0	0	2	17	3	0	1	3	25	3	116	2	1	0	1	35	20
6	0.1.15.2.2.1.1	unclassified	0	232	0	0	0	0	3	0	0	0	0	0	0	2	17	3	0	1	3	25	3	116	2	1	0	1	35	20
3	0.1.15.3	Erysipelotrichia	1	250	0	3	0	0	0	0	0	0	0	0	1	0	13	3	86	0	5	6	0	53	1	0	3	4	45	27
4	0.1.15.3.1	Erysipelotrichales	1	250	0	3	0	0	0	0	0	0	0	0	1	0	13	3	86	0	5	6	0	53	1	0	3	4	45	27
5	0.1.15.3.1.1	Erysipelotrichaceae	4	250	0	3	0	0	0	0	0	0	0	0	1	0	13	3	86	0	5	6	0	53	1	0	3	4	45	27
6	0.1.15.3.1.1.1	Bulleidia	0	4	0	0	0	0	0	0	0	0	0	0	0	0	0	0	0	0	2	0	0	1	0	0	0	1	0	0
6	0.1.15.3.1.1.2	Erysipelotrichaceae_incertae_sedis	0	7	0	0	0	0	0	0	0	0	0	0	0	0	0	0	0	0	1	1	0	5	0	0	0	0	0	0
6	0.1.15.3.1.1.3	Solobacterium	0	238	0	3	0	0	0	0	0	0	0	0	1	0	13	3	86	0	2	5	0	47	1	0	3	3	45	26
3	0.1.15.4	Negativicutes	1	18893	214	228	666	7	2054	1222	90	209	168	4	352	421	1146	296	1061	1005	322	149	125	774	24	57	2926	87	4281	1005
4	0.1.15.4.1	Selenomonadales	2	18893	214	228	666	7	2054	1222	90	209	168	4	352	421	1146	296	1061	1005	322	149	125	774	24	57	2926	87	4281	1005
5	0.1.15.4.1.1	Acidaminococcaceae	1	3	0	0	0	0	0	0	0	0	0	0	0	0	0	1	0	0	0	0	0	1	0	0	0	0	1	0
6	0.1.15.4.1.1.1	Acidaminococcus	0	3	0	0	0	0	0	0	0	0	0	0	0	0	0	1	0	0	0	0	0	1	0	0	0	0	1	0
5	0.1.15.4.1.2	Veillonellaceae	9	18890	214	228	666	7	2054	1222	90	209	168	4	352	421	1146	295	1061	1005	322	149	125	773	24	57	2926	87	4280	1005
6	0.1.15.4.1.2.2	Anaeroglobus	0	123	0	0	0	0	0	0	0	0	0	0	0	0	92	1	2	0	6	0	2	7	0	0	0	2	0	11
6	0.1.15.4.1.2.4	Dialister	0	466	1	0	0	0	1	0	0	0	0	0	0	0	101	7	5	0	58	26	13	188	0	0	2	6	7	51
6	0.1.15.4.1.2.5	Megasphaera	0	172	0	0	0	0	1	1	1	0	0	0	0	0	12	32	10	0	4	5	4	23	2	1	10	1	24	41
6	0.1.15.4.1.2.6	Mitsuokella	0	4	0	0	0	0	0	0	0	0	0	0	0	0	0	0	1	0	0	3	0	0	0	0	0	0	0	0
6	0.1.15.4.1.2.7	Selenomonas	0	685	0	0	0	0	3	41	1	0	0	0	0	1	299	5	3	0	43	10	27	148	0	1	4	5	24	70
6	0.1.15.4.1.2.8	Veillonella	0	17237	212	228	662	7	2045	1113	86	208	168	4	351	419	611	244	1037	1004	201	104	79	378	22	55	2900	73	4205	821
6	0.1.15.4.1.2.9	unclassified	0	200	1	0	4	0	4	67	2	1	0	0	1	0	31	6	3	1	10	1	0	29	0	0	9	0	20	10
3	0.1.15.5	unclassified	1	135	0	1	0	5	9	3	0	3	0	0	0	0	29	2	0	1	14	5	1	44	0	1	3	2	5	7
4	0.1.15.5.1	unclassified	1	135	0	1	0	5	9	3	0	3	0	0	0	0	29	2	0	1	14	5	1	44	0	1	3	2	5	7
5	0.1.15.5.1.1	unclassified	1	135	0	1	0	5	9	3	0	3	0	0	0	0	29	2	0	1	14	5	1	44	0	1	3	2	5	7
6	0.1.15.5.1.1.1	unclassified	0	135	0	1	0	5	9	3	0	3	0	0	0	0	29	2	0	1	14	5	1	44	0	1	3	2	5	7
2	0.1.16	OD1	1	99	0	0	0	0	0	0	0	0	0	0	0	0	99	0	0	0	0	0	0	0	0	0	0	0	0	0
3	0.1.16.1	OD1_class_incertae_sedis	1	99	0	0	0	0	0	0	0	0	0	0	0	0	99	0	0	0	0	0	0	0	0	0	0	0	0	0
4	0.1.16.1.1	OD1_order_incertae_sedis	1	99	0	0	0	0	0	0	0	0	0	0	0	0	99	0	0	0	0	0	0	0	0	0	0	0	0	0
5	0.1.16.1.1.1	OD1_family_incertae_sedis	1	99	0	0	0	0	0	0	0	0	0	0	0	0	99	0	0	0	0	0	0	0	0	0	0	0	0	0
6	0.1.16.1.1.1.1	OD1_genus_incertae_sedis	0	99	0	0	0	0	0	0	0	0	0	0	0	0	99	0	0	0	0	0	0	0	0	0	0	0	0	0
2	0.1.17	SR1	1	793	0	0	0	0	22	0	1	0	0	1	0	0	353	6	4	0	39	28	6	312	1	0	0	4	9	7
3	0.1.17.1	SR1_class_incertae_sedis	1	793	0	0	0	0	22	0	1	0	0	1	0	0	353	6	4	0	39	28	6	312	1	0	0	4	9	7
4	0.1.17.1.1	SR1_order_incertae_sedis	1	793	0	0	0	0	22	0	1	0	0	1	0	0	353	6	4	0	39	28	6	312	1	0	0	4	9	7
5	0.1.17.1.1.1	SR1_family_incertae_sedis	1	793	0	0	0	0	22	0	1	0	0	1	0	0	353	6	4	0	39	28	6	312	1	0	0	4	9	7
6	0.1.17.1.1.1.1	SR1_genus_incertae_sedis	0	793	0	0	0	0	22	0	1	0	0	1	0	0	353	6	4	0	39	28	6	312	1	0	0	4	9	7
2	0.1.18	TM7	1	9	0	0	0	0	1	0	0	0	0	0	0	0	1	0	0	0	0	0	0	7	0	0	0	0	0	0
3	0.1.18.1	TM7_class_incertae_sedis	1	9	0	0	0	0	1	0	0	0	0	0	0	0	1	0	0	0	0	0	0	7	0	0	0	0	0	0
4	0.1.18.1.1	TM7_order_incertae_sedis	1	9	0	0	0	0	1	0	0	0	0	0	0	0	1	0	0	0	0	0	0	7	0	0	0	0	0	0
5	0.1.18.1.1.1	TM7_family_incertae_sedis	1	9	0	0	0	0	1	0	0	0	0	0	0	0	1	0	0	0	0	0	0	7	0	0	0	0	0	0
6	0.1.18.1.1.1.1	TM7_genus_incertae_sedis	0	9	0	0	0	0	1	0	0	0	0	0	0	0	1	0	0	0	0	0	0	7	0	0	0	0	0	0
2	0.1.19	unclassified	1	3684	1	3	1	20	17	1	4	0	0	2	0	2	2855	23	8	1	129	25	11	480	2	1	16	2	25	55
3	0.1.19.1	unclassified	1	3684	1	3	1	20	17	1	4	0	0	2	0	2	2855	23	8	1	129	25	11	480	2	1	16	2	25	55
4	0.1.19.1.1	unclassified	1	3684	1	3	1	20	17	1	4	0	0	2	0	2	2855	23	8	1	129	25	11	480	2	1	16	2	25	55
5	0.1.19.1.1.1	unclassified	1	3684	1	3	1	20	17	1	4	0	0	2	0	2	2855	23	8	1	129	25	11	480	2	1	16	2	25	55
6	0.1.19.1.1.1.1	unclassified	0	3684	1	3	1	20	17	1	4	0	0	2	0	2	2855	23	8	1	129	25	11	480	2	1	16	2	25	55
2	0.1.2	Actinobacteria	1	178226	528	2481	494	5755	19584	1216	2173	1363	194	4828	2464	3081	54410	3378	6914	2660	12629	1973	149	19430	500	333	10451	2069	18698	471
3	0.1.2.1	Actinobacteria	8	178226	528	2481	494	5755	19584	1216	2173	1363	194	4828	2464	3081	54410	3378	6914	2660	12629	1973	149	19430	500	333	10451	2069	18698	471
4	0.1.2.1.1	Acidimicrobiales	3	83	0	0	0	1	1	0	0	0	0	0	0	0	81	0	0	0	0	0	0	0	0	0	0	0	0	0
5	0.1.2.1.1.1	Acidimicrobiaceae	1	70	0	0	0	1	1	0	0	0	0	0	0	0	68	0	0	0	0	0	0	0	0	0	0	0	0	0
6	0.1.2.1.1.1.1	Ilumatobacter	0	70	0	0	0	1	1	0	0	0	0	0	0	0	68	0	0	0	0	0	0	0	0	0	0	0	0	0
5	0.1.2.1.1.2	Iamiaceae	1	4	0	0	0	0	0	0	0	0	0	0	0	0	4	0	0	0	0	0	0	0	0	0	0	0	0	0
6	0.1.2.1.1.2.1	Iamia	0	4	0	0	0	0	0	0	0	0	0	0	0	0	4	0	0	0	0	0	0	0	0	0	0	0	0	0
5	0.1.2.1.1.3	unclassified	1	9	0	0	0	0	0	0	0	0	0	0	0	0	9	0	0	0	0	0	0	0	0	0	0	0	0	0
6	0.1.2.1.1.3.1	unclassified	0	9	0	0	0	0	0	0	0	0	0	0	0	0	9	0	0	0	0	0	0	0	0	0	0	0	0	0
4	0.1.2.1.2	Actinomycetales	27	175325	517	2480	494	5740	19576	1211	2173	1360	184	4825	2447	3078	52487	3324	6846	2653	12605	1947	141	18909	495	331	10443	2066	18616	377
5	0.1.2.1.2.1	Actinomycetaceae	3	76473	61	1057	129	23	9423	937	250	534	142	1915	600	1962	11228	2984	4296	1627	5620	1580	77	9243	217	226	8189	1752	12201	200
6	0.1.2.1.2.1.1	Actinomyces	0	76254	61	1057	129	23	9421	937	250	534	142	1913	600	1962	11224	2983	4295	1627	5618	1580	76	9046	217	226	8188	1751	12194	200
6	0.1.2.1.2.1.2	Mobiluncus	0	193	0	0	0	0	0	0	0	0	0	0	0	0	0	0	0	0	0	0	0	193	0	0	0	0	0	0
6	0.1.2.1.2.1.3	unclassified	0	26	0	0	0	0	2	0	0	0	0	2	0	0	4	1	1	0	2	0	1	4	0	0	1	1	7	0
5	0.1.2.1.2.10	Geodermatophilaceae	3	205	0	2	0	0	2	0	0	0	0	1	0	0	200	0	0	0	0	0	0	0	0	0	0	0	0	0
6	0.1.2.1.2.10.1	Blastococcus	0	92	0	0	0	0	1	0	0	0	0	1	0	0	90	0	0	0	0	0	0	0	0	0	0	0	0	0
6	0.1.2.1.2.10.3	unclassified	0	112	0	1	0	0	1	0	0	0	0	0	0	0	110	0	0	0	0	0	0	0	0	0	0	0	0	0
5	0.1.2.1.2.12	Intrasporangiaceae	6	5465	0	3	1	104	10	4	0	1	0	7	1	0	5311	1	2	0	10	0	0	4	0	0	1	0	1	4
6	0.1.2.1.2.12.1	Janibacter	0	4054	0	3	0	73	2	3	0	1	0	0	1	0	3955	0	2	0	5	0	0	4	0	0	1	0	0	4
6	0.1.2.1.2.12.3	Ornithinimicrobium	0	158	0	0	0	4	0	1	0	0	0	0	0	0	153	0	0	0	0	0	0	0	0	0	0	0	0	0
6	0.1.2.1.2.12.5	Terrabacter	0	57	0	0	0	2	0	0	0	0	0	0	0	0	55	0	0	0	0	0	0	0	0	0	0	0	0	0
6	0.1.2.1.2.12.6	unclassified	0	1193	0	0	1	25	6	0	0	0	0	7	0	0	1147	1	0	0	5	0	0	0	0	0	0	0	1	0
5	0.1.2.1.2.13	Kineosporiaceae	2	68	0	0	0	0	0	0	0	0	0	0	0	0	68	0	0	0	0	0	0	0	0	0	0	0	0	0
6	0.1.2.1.2.13.1	Kineosporia	0	47	0	0	0	0	0	0	0	0	0	0	0	0	47	0	0	0	0	0	0	0	0	0	0	0	0	0
6	0.1.2.1.2.13.2	Quadrisphaera	0	21	0	0	0	0	0	0	0	0	0	0	0	0	21	0	0	0	0	0	0	0	0	0	0	0	0	0
5	0.1.2.1.2.14	Microbacteriaceae	7	434	1	2	0	21	5	2	0	0	0	10	0	0	383	1	2	0	5	0	0	0	0	0	2	0	0	0
6	0.1.2.1.2.14.1	Agrococcus	0	23	0	0	0	6	1	0	0	0	0	0	0	0	11	0	0	0	3	0	0	0	0	0	2	0	0	0
6	0.1.2.1.2.14.2	Agromyces	0	39	0	0	0	1	0	0	0	0	0	0	0	0	38	0	0	0	0	0	0	0	0	0	0	0	0	0
6	0.1.2.1.2.14.3	Curtobacterium	0	19	0	0	0	0	0	0	0	0	0	6	0	0	12	0	1	0	0	0	0	0	0	0	0	0	0	0
6	0.1.2.1.2.14.4	Leucobacter	0	6	0	0	0	0	0	0	0	0	0	1	0	0	4	1	0	0	0	0	0	0	0	0	0	0	0	0
6	0.1.2.1.2.14.5	Microbacterium	0	91	1	2	0	7	3	1	0	0	0	2	0	0	74	0	0	0	1	0	0	0	0	0	0	0	0	0
6	0.1.2.1.2.14.6	Microcella	0	65	0	0	0	1	1	0	0	0	0	0	0	0	63	0	0	0	0	0	0	0	0	0	0	0	0	0
6	0.1.2.1.2.14.7	unclassified	0	191	0	0	0	6	0	1	0	0	0	1	0	0	181	0	1	0	1	0	0	0	0	0	0	0	0	0
5	0.1.2.1.2.15	Micrococcaceae	8	76234	438	1402	360	5265	10043	244	1911	814	39	2761	1836	1106	20283	325	2534	1016	6791	358	44	9316	275	102	2201	308	6307	155
6	0.1.2.1.2.15.1	Arthrobacter	0	482	0	0	0	12	1	0	1	0	0	5	0	0	458	0	0	0	2	0	0	2	0	0	1	0	0	0
6	0.1.2.1.2.15.2	Kocuria	0	565	1	0	0	2	4	4	1	0	0	6	2	0	540	0	0	0	4	0	0	1	0	0	0	0	0	0
6	0.1.2.1.2.15.3	Micrococcus	0	793	3	0	0	9	1	2	0	0	0	9	1	0	763	0	0	0	1	0	0	1	0	0	3	0	0	0
6	0.1.2.1.2.15.4	Nesterenkonia	0	3169	0	0	0	20	3	1	0	0	0	0	0	0	3136	0	0	0	6	0	0	3	0	0	0	0	0	0
6	0.1.2.1.2.15.5	Rothia	0	69122	434	1398	359	5195	10029	235	1907	814	39	2735	1833	1105	13354	324	2533	1015	6773	358	44	9305	275	102	2195	308	6298	155
6	0.1.2.1.2.15.6	Sinomonas	0	26	0	0	0	0	0	0	0	0	0	0	0	0	26	0	0	0	0	0	0	0	0	0	0	0	0	0
6	0.1.2.1.2.15.7	Zhihengliuella	0	1771	0	1	0	24	2	2	2	0	0	0	0	0	1738	1	0	0	0	0	0	1	0	0	0	0	0	0
6	0.1.2.1.2.15.8	unclassified	0	306	0	3	1	3	3	0	0	0	0	6	0	1	268	0	1	1	5	0	0	3	0	0	2	0	9	0
5	0.1.2.1.2.16	Micromonosporaceae	2	32	0	0	0	0	1	0	0	0	0	0	0	0	31	0	0	0	0	0	0	0	0	0	0	0	0	0
6	0.1.2.1.2.16.1	Actinoplanes	0	6	0	0	0	0	0	0	0	0	0	0	0	0	6	0	0	0	0	0	0	0	0	0	0	0	0	0
6	0.1.2.1.2.16.2	unclassified	0	26	0	0	0	0	1	0	0	0	0	0	0	0	25	0	0	0	0	0	0	0	0	0	0	0	0	0
5	0.1.2.1.2.17	Mycobacteriaceae	1	128	0	0	0	0	0	0	0	0	0	0	0	0	128	0	0	0	0	0	0	0	0	0	0	0	0	0
6	0.1.2.1.2.17.1	Mycobacterium	0	128	0	0	0	0	0	0	0	0	0	0	0	0	128	0	0	0	0	0	0	0	0	0	0	0	0	0
5	0.1.2.1.2.19	Nocardiaceae	3	238	0	1	0	3	0	0	0	0	0	1	0	2	231	0	0	0	0	0	0	0	0	0	0	0	0	0
6	0.1.2.1.2.19.1	Gordonia	0	100	0	1	0	2	0	0	0	0	0	1	0	0	96	0	0	0	0	0	0	0	0	0	0	0	0	0
6	0.1.2.1.2.19.2	Rhodococcus	0	65	0	0	0	0	0	0	0	0	0	0	0	2	63	0	0	0	0	0	0	0	0	0	0	0	0	0
6	0.1.2.1.2.19.3	Williamsia	0	73	0	0	0	1	0	0	0	0	0	0	0	0	72	0	0	0	0	0	0	0	0	0	0	0	0	0
5	0.1.2.1.2.20	Nocardioidaceae	5	2380	1	0	0	22	3	4	0	1	0	10	0	0	2310	0	0	0	10	0	0	4	0	0	3	0	11	1
6	0.1.2.1.2.20.1	Aeromicrobium	0	458	1	0	0	8	0	1	0	0	0	2	0	0	444	0	0	0	1	0	0	1	0	0	0	0	0	0
6	0.1.2.1.2.20.3	Marmoricola	0	70	0	0	0	0	0	0	0	0	0	0	0	0	70	0	0	0	0	0	0	0	0	0	0	0	0	0
6	0.1.2.1.2.20.4	Nocardioides	0	1616	0	0	0	13	3	2	0	0	0	7	0	0	1570	0	0	0	5	0	0	2	0	0	2	0	11	1
6	0.1.2.1.2.20.5	unclassified	0	235	0	0	0	1	0	1	0	1	0	0	0	0	226	0	0	0	4	0	0	1	0	0	1	0	0	0
5	0.1.2.1.2.21	Nocardiopsaceae	1	13	0	0	0	1	0	0	0	0	0	0	0	0	12	0	0	0	0	0	0	0	0	0	0	0	0	0
6	0.1.2.1.2.21.1	Nocardiopsis	0	13	0	0	0	1	0	0	0	0	0	0	0	0	12	0	0	0	0	0	0	0	0	0	0	0	0	0
5	0.1.2.1.2.22	Promicromonosporaceae	3	98	0	0	0	1	0	2	0	0	0	0	1	0	94	0	0	0	0	0	0	0	0	0	0	0	0	0
6	0.1.2.1.2.22.2	Isoptericola	0	95	0	0	0	0	0	0	0	0	0	0	1	0	94	0	0	0	0	0	0	0	0	0	0	0	0	0
5	0.1.2.1.2.23	Propionibacteriaceae	3	297	0	0	0	0	0	0	0	0	2	1	0	0	222	0	2	0	16	0	0	49	0	0	3	0	0	2
6	0.1.2.1.2.23.2	Propionibacterium	0	65	0	0	0	0	0	0	0	0	2	0	0	0	60	0	2	0	0	0	0	1	0	0	0	0	0	0
6	0.1.2.1.2.23.3	unclassified	0	231	0	0	0	0	0	0	0	0	0	1	0	0	161	0	0	0	16	0	0	48	0	0	3	0	0	2
5	0.1.2.1.2.24	Pseudonocardiaceae	5	370	0	2	1	2	1	1	0	0	0	6	0	0	353	0	0	1	1	0	0	0	0	0	0	0	2	0
6	0.1.2.1.2.24.3	Pseudonocardia	0	44	0	0	0	2	0	0	0	0	0	0	0	0	42	0	0	0	0	0	0	0	0	0	0	0	0	0
6	0.1.2.1.2.24.4	Saccharopolyspora	0	44	0	0	1	0	0	0	0	0	0	0	0	0	41	0	0	1	0	0	0	0	0	0	0	0	1	0
6	0.1.2.1.2.24.5	unclassified	0	280	0	2	0	0	1	1	0	0	0	5	0	0	269	0	0	0	1	0	0	0	0	0	0	0	1	0
5	0.1.2.1.2.26	Streptomycetaceae	2	26	0	0	0	1	0	0	0	0	0	0	0	0	24	0	0	0	0	0	0	1	0	0	0	0	0	0
6	0.1.2.1.2.26.1	Streptomyces	0	6	0	0	0	1	0	0	0	0	0	0	0	0	4	0	0	0	0	0	0	1	0	0	0	0	0	0
6	0.1.2.1.2.26.2	unclassified	0	20	0	0	0	0	0	0	0	0	0	0	0	0	20	0	0	0	0	0	0	0	0	0	0	0	0	0
5	0.1.2.1.2.27	unclassified	1	2771	4	5	3	28	45	7	3	3	0	12	4	5	2161	11	9	5	102	5	20	215	3	2	34	5	71	9
6	0.1.2.1.2.27.1	unclassified	0	2771	4	5	3	28	45	7	3	3	0	12	4	5	2161	11	9	5	102	5	20	215	3	2	34	5	71	9
5	0.1.2.1.2.3	Brevibacteriaceae	1	1149	0	2	0	43	9	2	1	1	0	9	0	1	1072	0	0	0	4	0	0	2	0	0	0	0	2	1
6	0.1.2.1.2.3.1	Brevibacterium	0	1149	0	2	0	43	9	2	1	1	0	9	0	1	1072	0	0	0	4	0	0	2	0	0	0	0	2	1
5	0.1.2.1.2.5	Corynebacteriaceae	2	1448	8	1	0	3	18	3	7	5	0	81	2	2	1190	2	0	3	17	4	0	67	0	1	9	1	21	3
6	0.1.2.1.2.5.1	Corynebacterium	0	1446	8	1	0	3	17	3	7	5	0	80	2	2	1190	2	0	3	17	4	0	67	0	1	9	1	21	3
5	0.1.2.1.2.6	Dermabacteraceae	2	5070	2	1	0	208	8	0	0	1	1	9	3	0	4819	0	1	1	12	0	0	3	0	0	1	0	0	0
6	0.1.2.1.2.6.1	Brachybacterium	0	5069	2	1	0	208	8	0	0	1	1	9	3	0	4818	0	1	1	12	0	0	3	0	0	1	0	0	0
5	0.1.2.1.2.7	Dermacoccaceae	2	899	1	0	0	3	1	2	0	0	0	0	0	0	880	0	0	0	10	0	0	0	0	0	0	0	0	2
6	0.1.2.1.2.7.1	Dermacoccus	0	750	1	0	0	1	1	2	0	0	0	0	0	0	736	0	0	0	9	0	0	0	0	0	0	0	0	0
6	0.1.2.1.2.7.2	Kytococcus	0	149	0	0	0	2	0	0	0	0	0	0	0	0	144	0	0	0	1	0	0	0	0	0	0	0	0	2
5	0.1.2.1.2.8	Dermatophilaceae	1	204	0	0	0	0	1	2	0	0	0	0	0	0	197	0	0	0	2	0	0	2	0	0	0	0	0	0
6	0.1.2.1.2.8.1	Piscicoccus	0	204	0	0	0	0	1	2	0	0	0	0	0	0	197	0	0	0	2	0	0	2	0	0	0	0	0	0
5	0.1.2.1.2.9	Dietziaceae	1	1317	1	1	0	11	4	1	1	0	0	2	0	0	1290	0	0	0	4	0	0	2	0	0	0	0	0	0
6	0.1.2.1.2.9.1	Dietzia	0	1317	1	1	0	11	4	1	1	0	0	2	0	0	1290	0	0	0	4	0	0	2	0	0	0	0	0	0
4	0.1.2.1.3	Bifidobacteriales	1	1695	0	1	0	9	2	2	0	0	4	1	0	0	1366	7	35	0	15	21	3	200	0	2	6	1	1	19
5	0.1.2.1.3.1	Bifidobacteriaceae	4	1695	0	1	0	9	2	2	0	0	4	1	0	0	1366	7	35	0	15	21	3	200	0	2	6	1	1	19
6	0.1.2.1.3.1.1	Alloscardovia	0	4	0	0	0	0	0	0	0	0	0	0	0	0	0	0	0	0	0	0	0	0	0	0	4	0	0	0
6	0.1.2.1.3.1.2	Bifidobacterium	0	1413	0	0	0	9	2	2	0	0	4	0	0	0	1172	1	16	0	9	19	1	161	0	1	0	1	1	14
6	0.1.2.1.3.1.3	Scardovia	0	225	0	1	0	0	0	0	0	0	0	1	0	0	192	1	13	0	4	2	2	6	0	1	2	0	0	0
6	0.1.2.1.3.1.4	unclassified	0	53	0	0	0	0	0	0	0	0	0	0	0	0	2	5	6	0	2	0	0	33	0	0	0	0	0	5
4	0.1.2.1.4	Coriobacteriales	1	781	11	0	0	0	1	2	0	3	6	0	16	3	156	47	33	7	6	4	5	319	5	0	2	2	79	74
5	0.1.2.1.4.1	Coriobacteriaceae	5	781	11	0	0	0	1	2	0	3	6	0	16	3	156	47	33	7	6	4	5	319	5	0	2	2	79	74
6	0.1.2.1.4.1.1	Atopobium	0	449	11	0	0	0	1	2	0	3	6	0	16	3	128	43	32	6	2	1	2	39	5	0	2	2	79	66
6	0.1.2.1.4.1.2	Cryptobacterium	0	5	0	0	0	0	0	0	0	0	0	0	0	0	0	1	0	0	0	0	0	4	0	0	0	0	0	0
6	0.1.2.1.4.1.3	Olsenella	0	310	0	0	0	0	0	0	0	0	0	0	0	0	21	3	1	0	4	2	3	268	0	0	0	0	0	8
6	0.1.2.1.4.1.4	Slackia	0	4	0	0	0	0	0	0	0	0	0	0	0	0	0	0	0	0	0	0	0	4	0	0	0	0	0	0
6	0.1.2.1.4.1.5	unclassified	0	13	0	0	0	0	0	0	0	0	0	0	0	0	7	0	0	1	0	1	0	4	0	0	0	0	0	0
4	0.1.2.1.5	Nitriliruptorales	1	108	0	0	0	0	0	0	0	0	0	0	0	0	106	0	0	0	1	0	0	0	0	0	0	0	0	1
5	0.1.2.1.5.1	Nitriliruptoraceae	1	108	0	0	0	0	0	0	0	0	0	0	0	0	106	0	0	0	1	0	0	0	0	0	0	0	0	1
6	0.1.2.1.5.1.1	Nitriliruptor	0	108	0	0	0	0	0	0	0	0	0	0	0	0	106	0	0	0	1	0	0	0	0	0	0	0	0	1
4	0.1.2.1.6	Rubrobacterales	1	12	0	0	0	0	1	0	0	0	0	0	0	0	10	0	0	0	0	0	0	1	0	0	0	0	0	0
5	0.1.2.1.6.1	Rubrobacteraceae	1	12	0	0	0	0	1	0	0	0	0	0	0	0	10	0	0	0	0	0	0	1	0	0	0	0	0	0
6	0.1.2.1.6.1.1	Rubrobacter	0	12	0	0	0	0	1	0	0	0	0	0	0	0	10	0	0	0	0	0	0	1	0	0	0	0	0	0
4	0.1.2.1.7	Solirubrobacterales	3	113	0	0	0	3	1	1	0	0	0	1	1	0	105	0	0	0	0	0	0	1	0	0	0	0	0	0
5	0.1.2.1.7.1	Patulibacteraceae	1	14	0	0	0	0	1	0	0	0	0	1	0	0	12	0	0	0	0	0	0	0	0	0	0	0	0	0
6	0.1.2.1.7.1.1	Patulibacter	0	14	0	0	0	0	1	0	0	0	0	1	0	0	12	0	0	0	0	0	0	0	0	0	0	0	0	0
5	0.1.2.1.7.2	Solirubrobacteraceae	1	61	0	0	0	3	0	0	0	0	0	0	0	0	58	0	0	0	0	0	0	0	0	0	0	0	0	0
6	0.1.2.1.7.2.1	Solirubrobacter	0	61	0	0	0	3	0	0	0	0	0	0	0	0	58	0	0	0	0	0	0	0	0	0	0	0	0	0
5	0.1.2.1.7.3	unclassified	1	38	0	0	0	0	0	1	0	0	0	0	1	0	35	0	0	0	0	0	0	1	0	0	0	0	0	0
6	0.1.2.1.7.3.1	unclassified	0	38	0	0	0	0	0	1	0	0	0	0	1	0	35	0	0	0	0	0	0	1	0	0	0	0	0	0
4	0.1.2.1.8	unclassified	1	109	0	0	0	2	2	0	0	0	0	1	0	0	99	0	0	0	2	1	0	0	0	0	0	0	2	0
5	0.1.2.1.8.1	unclassified	1	109	0	0	0	2	2	0	0	0	0	1	0	0	99	0	0	0	2	1	0	0	0	0	0	0	2	0
6	0.1.2.1.8.1.1	unclassified	0	109	0	0	0	2	2	0	0	0	0	1	0	0	99	0	0	0	2	1	0	0	0	0	0	0	2	0
2	0.1.3	Armatimonadetes	2	85	0	0	0	0	0	0	0	0	0	0	0	0	83	0	0	0	0	0	0	2	0	0	0	0	0	0
3	0.1.3.1	Armatimonadetes_gp5_class_incertae_sedis	1	25	0	0	0	0	0	0	0	0	0	0	0	0	25	0	0	0	0	0	0	0	0	0	0	0	0	0
4	0.1.3.1.1	Armatimonadetes_gp5_order_incetae_sedis	1	25	0	0	0	0	0	0	0	0	0	0	0	0	25	0	0	0	0	0	0	0	0	0	0	0	0	0
5	0.1.3.1.1.1	Armatimonadetes_gp5_family_incetae_sedis	1	25	0	0	0	0	0	0	0	0	0	0	0	0	25	0	0	0	0	0	0	0	0	0	0	0	0	0
6	0.1.3.1.1.1.1	Armatimonadetes_gp5	0	25	0	0	0	0	0	0	0	0	0	0	0	0	25	0	0	0	0	0	0	0	0	0	0	0	0	0
3	0.1.3.2	Armatimonadia	1	60	0	0	0	0	0	0	0	0	0	0	0	0	58	0	0	0	0	0	0	2	0	0	0	0	0	0
4	0.1.3.2.1	Armatimonadales	1	60	0	0	0	0	0	0	0	0	0	0	0	0	58	0	0	0	0	0	0	2	0	0	0	0	0	0
5	0.1.3.2.1.1	Armatimonadaceae	1	60	0	0	0	0	0	0	0	0	0	0	0	0	58	0	0	0	0	0	0	2	0	0	0	0	0	0
6	0.1.3.2.1.1.1	Armatimonas_Armatimonadetes_gp1	0	60	0	0	0	0	0	0	0	0	0	0	0	0	58	0	0	0	0	0	0	2	0	0	0	0	0	0
2	0.1.4	Bacteroidetes	4	168809	458	910	150	174	10733	10254	423	559	493	509	217	3994	66655	6710	2125	374	6182	4395	1437	20492	926	258	8366	1433	12990	7592
3	0.1.4.1	Bacteroidia	1	132480	344	326	144	139	3260	8828	388	502	225	10	183	3927	48588	6596	1815	353	5049	3897	1302	16770	892	239	8233	1256	12438	6776
4	0.1.4.1.1	Bacteroidales	5	132480	344	326	144	139	3260	8828	388	502	225	10	183	3927	48588	6596	1815	353	5049	3897	1302	16770	892	239	8233	1256	12438	6776
5	0.1.4.1.1.1	Bacteroidales_incertae_sedis	1	25	0	0	0	0	0	0	0	0	0	0	0	0	0	0	0	0	4	2	0	18	0	0	0	0	0	1
6	0.1.4.1.1.1.1	Phocaeicola	0	25	0	0	0	0	0	0	0	0	0	0	0	0	0	0	0	0	4	2	0	18	0	0	0	0	0	1
5	0.1.4.1.1.2	Porphyromonadaceae	6	28474	60	141	3	132	379	76	254	4	13	5	14	30	17469	60	99	14	1880	1310	67	3642	65	33	62	216	1961	485
6	0.1.4.1.1.2.1	Dysgonomonas	0	50	0	0	0	0	0	0	0	0	0	0	0	0	50	0	0	0	0	0	0	0	0	0	0	0	0	0
6	0.1.4.1.1.2.2	Odoribacter	0	5	0	0	0	0	0	0	0	0	0	0	0	0	0	0	0	0	0	0	1	4	0	0	0	0	0	0
6	0.1.4.1.1.2.3	Parabacteroides	0	15	0	0	0	0	0	0	0	0	0	0	0	0	15	0	0	0	0	0	0	0	0	0	0	0	0	0
6	0.1.4.1.1.2.4	Porphyromonas	0	25692	6	41	0	130	322	25	60	4	12	5	11	24	16404	38	66	12	1777	1152	42	3217	55	33	24	210	1706	316
6	0.1.4.1.1.2.5	Tannerella	0	897	0	1	0	0	2	1	0	0	0	0	0	2	574	3	0	0	73	21	3	192	3	0	2	5	11	4
6	0.1.4.1.1.2.6	unclassified	0	1815	54	99	3	2	55	50	194	0	1	0	3	4	426	19	33	2	30	137	21	229	7	0	36	1	244	165
5	0.1.4.1.1.3	Prevotellaceae	3	102038	284	184	141	7	2879	8750	134	498	211	5	167	3897	29972	6497	1716	339	3116	2580	1230	12668	816	204	8158	1030	10353	6202
6	0.1.4.1.1.3.1	Hallella	0	97	0	0	0	0	0	0	0	0	1	0	0	0	62	0	1	0	11	1	4	11	0	0	1	0	0	5
6	0.1.4.1.1.3.2	Prevotella	0	99722	283	179	141	7	2835	8725	133	498	210	5	167	3896	28368	6489	1715	339	3060	2527	1224	12429	811	204	8154	1003	10216	6104
6	0.1.4.1.1.3.3	unclassified	0	2219	1	5	0	0	44	25	1	0	0	0	0	1	1542	8	0	0	45	52	2	228	5	0	3	27	137	93
5	0.1.4.1.1.5	unclassified	1	1942	0	1	0	0	2	2	0	0	1	0	2	0	1147	39	0	0	49	5	5	442	11	2	13	10	124	87
6	0.1.4.1.1.5.1	unclassified	0	1942	0	1	0	0	2	2	0	0	1	0	2	0	1147	39	0	0	49	5	5	442	11	2	13	10	124	87
3	0.1.4.2	Sphingobacteria	1	1722	1	1	0	5	2	1	0	0	0	1	0	0	1700	0	1	0	5	1	0	1	0	0	0	0	3	0
4	0.1.4.2.1	Sphingobacteriales	7	1722	1	1	0	5	2	1	0	0	0	1	0	0	1700	0	1	0	5	1	0	1	0	0	0	0	3	0
5	0.1.4.2.1.1	Cyclobacteriaceae	1	84	0	0	0	0	0	0	0	0	0	0	0	0	84	0	0	0	0	0	0	0	0	0	0	0	0	0
6	0.1.4.2.1.1.1	Algoriphagus	0	84	0	0	0	0	0	0	0	0	0	0	0	0	84	0	0	0	0	0	0	0	0	0	0	0	0	0
5	0.1.4.2.1.2	Flammeovirgaceae	1	8	0	0	0	0	0	0	0	0	0	0	0	0	8	0	0	0	0	0	0	0	0	0	0	0	0	0
6	0.1.4.2.1.2.1	unclassified	0	8	0	0	0	0	0	0	0	0	0	0	0	0	8	0	0	0	0	0	0	0	0	0	0	0	0	0
5	0.1.4.2.1.3	Rhodothermaceae	1	126	0	0	0	0	0	0	0	0	0	0	0	0	126	0	0	0	0	0	0	0	0	0	0	0	0	0
6	0.1.4.2.1.3.1	unclassified	0	126	0	0	0	0	0	0	0	0	0	0	0	0	126	0	0	0	0	0	0	0	0	0	0	0	0	0
5	0.1.4.2.1.4	Chitinophagaceae	6	275	0	1	0	1	0	1	0	0	0	1	0	0	264	0	1	0	3	1	0	0	0	0	0	0	2	0
6	0.1.4.2.1.4.2	Parasegetibacter	0	26	0	0	0	0	0	0	0	0	0	0	0	0	26	0	0	0	0	0	0	0	0	0	0	0	0	0
6	0.1.4.2.1.4.3	Sediminibacterium	0	77	0	0	0	0	0	0	0	0	0	0	0	0	73	0	0	0	2	0	0	0	0	0	0	0	2	0
6	0.1.4.2.1.4.4	Segetibacter	0	3	0	0	0	0	0	1	0	0	0	0	0	0	0	0	1	0	1	0	0	0	0	0	0	0	0	0
6	0.1.4.2.1.4.6	unclassified	0	167	0	1	0	0	0	0	0	0	0	1	0	0	164	0	0	0	0	1	0	0	0	0	0	0	0	0
5	0.1.4.2.1.5	Cytophagaceae	7	480	0	0	0	0	0	0	0	0	0	0	0	0	479	0	0	0	0	0	0	0	0	0	0	0	1	0
6	0.1.4.2.1.5.1	Dyadobacter	0	59	0	0	0	0	0	0	0	0	0	0	0	0	59	0	0	0	0	0	0	0	0	0	0	0	0	0
6	0.1.4.2.1.5.2	Flectobacillus	0	5	0	0	0	0	0	0	0	0	0	0	0	0	5	0	0	0	0	0	0	0	0	0	0	0	0	0
6	0.1.4.2.1.5.3	Hymenobacter	0	208	0	0	0	0	0	0	0	0	0	0	0	0	208	0	0	0	0	0	0	0	0	0	0	0	0	0
6	0.1.4.2.1.5.4	Pontibacter	0	90	0	0	0	0	0	0	0	0	0	0	0	0	90	0	0	0	0	0	0	0	0	0	0	0	0	0
6	0.1.4.2.1.5.5	Rhodocytophaga	0	6	0	0	0	0	0	0	0	0	0	0	0	0	6	0	0	0	0	0	0	0	0	0	0	0	0	0
6	0.1.4.2.1.5.6	Spirosoma	0	111	0	0	0	0	0	0	0	0	0	0	0	0	111	0	0	0	0	0	0	0	0	0	0	0	0	0
5	0.1.4.2.1.6	Sphingobacteriaceae	4	601	1	0	0	3	2	0	0	0	0	0	0	0	593	0	0	0	2	0	0	0	0	0	0	0	0	0
6	0.1.4.2.1.6.1	Mucilaginibacter	0	29	0	0	0	0	0	0	0	0	0	0	0	0	29	0	0	0	0	0	0	0	0	0	0	0	0	0
6	0.1.4.2.1.6.2	Pedobacter	0	34	0	0	0	1	0	0	0	0	0	0	0	0	33	0	0	0	0	0	0	0	0	0	0	0	0	0
6	0.1.4.2.1.6.3	Sphingobacterium	0	506	1	0	0	2	2	0	0	0	0	0	0	0	499	0	0	0	2	0	0	0	0	0	0	0	0	0
6	0.1.4.2.1.6.4	unclassified	0	32	0	0	0	0	0	0	0	0	0	0	0	0	32	0	0	0	0	0	0	0	0	0	0	0	0	0
5	0.1.4.2.1.7	unclassified	1	148	0	0	0	1	0	0	0	0	0	0	0	0	146	0	0	0	0	0	0	1	0	0	0	0	0	0
6	0.1.4.2.1.7.1	unclassified	0	148	0	0	0	1	0	0	0	0	0	0	0	0	146	0	0	0	0	0	0	1	0	0	0	0	0	0
3	0.1.4.3	Flavobacteria	1	26019	102	541	4	27	6877	195	16	54	10	456	34	42	13573	13	204	16	833	240	29	1854	19	16	114	159	411	180
4	0.1.4.3.1	Flavobacteriales	2	26019	102	541	4	27	6877	195	16	54	10	456	34	42	13573	13	204	16	833	240	29	1854	19	16	114	159	411	180
5	0.1.4.3.1.1	Cryomorphaceae	1	4	0	0	0	0	0	0	0	0	0	0	0	0	4	0	0	0	0	0	0	0	0	0	0	0	0	0
6	0.1.4.3.1.1.1	unclassified	0	4	0	0	0	0	0	0	0	0	0	0	0	0	4	0	0	0	0	0	0	0	0	0	0	0	0	0
5	0.1.4.3.1.2	Flavobacteriaceae	11	26015	102	541	4	27	6877	195	16	54	10	456	34	42	13569	13	204	16	833	240	29	1854	19	16	114	159	411	180
6	0.1.4.3.1.2.1	Capnocytophaga	0	12957	1	67	1	0	235	188	13	40	3	336	22	27	8873	3	103	13	733	220	26	1408	15	13	89	125	255	148
6	0.1.4.3.1.2.10	Wautersiella	0	1452	0	0	0	0	0	0	0	0	1	0	0	0	1451	0	0	0	0	0	0	0	0	0	0	0	0	0
6	0.1.4.3.1.2.11	unclassified	0	9821	100	474	3	20	6641	6	2	14	6	119	12	15	1475	10	101	3	99	20	3	445	4	3	24	34	156	32
6	0.1.4.3.1.2.2	Chryseobacterium	0	783	0	0	0	4	0	0	0	0	0	1	0	0	776	0	0	0	0	0	0	1	0	0	1	0	0	0
6	0.1.4.3.1.2.3	Cloacibacterium	0	241	0	0	0	0	0	0	0	0	0	0	0	0	241	0	0	0	0	0	0	0	0	0	0	0	0	0
6	0.1.4.3.1.2.4	Flavobacterium	0	594	1	0	0	3	1	0	1	0	0	0	0	0	587	0	0	0	1	0	0	0	0	0	0	0	0	0
6	0.1.4.3.1.2.5	Gelidibacter	0	30	0	0	0	0	0	0	0	0	0	0	0	0	30	0	0	0	0	0	0	0	0	0	0	0	0	0
6	0.1.4.3.1.2.6	Planobacterium	0	68	0	0	0	0	0	1	0	0	0	0	0	0	67	0	0	0	0	0	0	0	0	0	0	0	0	0
6	0.1.4.3.1.2.7	Salegentibacter	0	31	0	0	0	0	0	0	0	0	0	0	0	0	31	0	0	0	0	0	0	0	0	0	0	0	0	0
6	0.1.4.3.1.2.8	Salinimicrobium	0	29	0	0	0	0	0	0	0	0	0	0	0	0	29	0	0	0	0	0	0	0	0	0	0	0	0	0
6	0.1.4.3.1.2.9	Soonwooa	0	9	0	0	0	0	0	0	0	0	0	0	0	0	9	0	0	0	0	0	0	0	0	0	0	0	0	0
3	0.1.4.4	unclassified	1	8588	11	42	2	3	594	1230	19	3	258	42	0	25	2794	101	105	5	295	257	106	1867	15	3	19	18	138	636
4	0.1.4.4.1	unclassified	1	8588	11	42	2	3	594	1230	19	3	258	42	0	25	2794	101	105	5	295	257	106	1867	15	3	19	18	138	636
5	0.1.4.4.1.1	unclassified	1	8588	11	42	2	3	594	1230	19	3	258	42	0	25	2794	101	105	5	295	257	106	1867	15	3	19	18	138	636
6	0.1.4.4.1.1.1	unclassified	0	8588	11	42	2	3	594	1230	19	3	258	42	0	25	2794	101	105	5	295	257	106	1867	15	3	19	18	138	636
2	0.1.5	Chloroflexi	3	147	0	0	0	1	0	0	0	0	0	0	0	0	144	0	0	0	0	0	0	2	0	0	0	0	0	0
3	0.1.5.1	Anaerolineae	1	10	0	0	0	0	0	0	0	0	0	0	0	0	8	0	0	0	0	0	0	2	0	0	0	0	0	0
4	0.1.5.1.1	Anaerolineales	1	10	0	0	0	0	0	0	0	0	0	0	0	0	8	0	0	0	0	0	0	2	0	0	0	0	0	0
5	0.1.5.1.1.1	Anaerolineaceae	1	10	0	0	0	0	0	0	0	0	0	0	0	0	8	0	0	0	0	0	0	2	0	0	0	0	0	0
6	0.1.5.1.1.1.1	unclassified	0	10	0	0	0	0	0	0	0	0	0	0	0	0	8	0	0	0	0	0	0	2	0	0	0	0	0	0
3	0.1.5.2	Thermomicrobia	2	24	0	0	0	0	0	0	0	0	0	0	0	0	24	0	0	0	0	0	0	0	0	0	0	0	0	0
4	0.1.5.2.1	Sphaerobacterales	1	17	0	0	0	0	0	0	0	0	0	0	0	0	17	0	0	0	0	0	0	0	0	0	0	0	0	0
5	0.1.5.2.1.1	Sphaerobacteraceae	1	17	0	0	0	0	0	0	0	0	0	0	0	0	17	0	0	0	0	0	0	0	0	0	0	0	0	0
6	0.1.5.2.1.1.1	Sphaerobacter	0	17	0	0	0	0	0	0	0	0	0	0	0	0	17	0	0	0	0	0	0	0	0	0	0	0	0	0
4	0.1.5.2.2	unclassified	1	7	0	0	0	0	0	0	0	0	0	0	0	0	7	0	0	0	0	0	0	0	0	0	0	0	0	0
5	0.1.5.2.2.1	unclassified	1	7	0	0	0	0	0	0	0	0	0	0	0	0	7	0	0	0	0	0	0	0	0	0	0	0	0	0
6	0.1.5.2.2.1.1	unclassified	0	7	0	0	0	0	0	0	0	0	0	0	0	0	7	0	0	0	0	0	0	0	0	0	0	0	0	0
3	0.1.5.3	unclassified	1	113	0	0	0	1	0	0	0	0	0	0	0	0	112	0	0	0	0	0	0	0	0	0	0	0	0	0
4	0.1.5.3.1	unclassified	1	113	0	0	0	1	0	0	0	0	0	0	0	0	112	0	0	0	0	0	0	0	0	0	0	0	0	0
5	0.1.5.3.1.1	unclassified	1	113	0	0	0	1	0	0	0	0	0	0	0	0	112	0	0	0	0	0	0	0	0	0	0	0	0	0
6	0.1.5.3.1.1.1	unclassified	0	113	0	0	0	1	0	0	0	0	0	0	0	0	112	0	0	0	0	0	0	0	0	0	0	0	0	0
2	0.1.6	Deinococcus-Thermus	1	999	0	0	0	2	3	1	1	0	0	0	0	0	989	0	0	0	2	0	0	0	0	0	1	0	0	0
3	0.1.6.1	Deinococci	2	999	0	0	0	2	3	1	1	0	0	0	0	0	989	0	0	0	2	0	0	0	0	0	1	0	0	0
4	0.1.6.1.1	Deinococcales	2	787	0	0	0	2	3	1	0	0	0	0	0	0	778	0	0	0	2	0	0	0	0	0	1	0	0	0
5	0.1.6.1.1.1	Deinococcaceae	1	741	0	0	0	2	3	1	0	0	0	0	0	0	732	0	0	0	2	0	0	0	0	0	1	0	0	0
6	0.1.6.1.1.1.1	Deinococcus	0	741	0	0	0	2	3	1	0	0	0	0	0	0	732	0	0	0	2	0	0	0	0	0	1	0	0	0
5	0.1.6.1.1.2	unclassified	1	46	0	0	0	0	0	0	0	0	0	0	0	0	46	0	0	0	0	0	0	0	0	0	0	0	0	0
6	0.1.6.1.1.2.1	unclassified	0	46	0	0	0	0	0	0	0	0	0	0	0	0	46	0	0	0	0	0	0	0	0	0	0	0	0	0
4	0.1.6.1.2	Thermales	1	212	0	0	0	0	0	0	1	0	0	0	0	0	211	0	0	0	0	0	0	0	0	0	0	0	0	0
5	0.1.6.1.2.1	Thermaceae	2	212	0	0	0	0	0	0	1	0	0	0	0	0	211	0	0	0	0	0	0	0	0	0	0	0	0	0
6	0.1.6.1.2.1.1	Meiothermus	0	135	0	0	0	0	0	0	1	0	0	0	0	0	134	0	0	0	0	0	0	0	0	0	0	0	0	0
6	0.1.6.1.2.1.2	Thermus	0	77	0	0	0	0	0	0	0	0	0	0	0	0	77	0	0	0	0	0	0	0	0	0	0	0	0	0
2	0.1.7	Fusobacteria	1	64377	59	173	34	38	4053	422	92	44	675	132	1032	548	17711	172	5657	359	4108	1235	467	7080	254	140	1200	1435	15434	1823
3	0.1.7.1	Fusobacteria	1	64377	59	173	34	38	4053	422	92	44	675	132	1032	548	17711	172	5657	359	4108	1235	467	7080	254	140	1200	1435	15434	1823
4	0.1.7.1.1	Fusobacteriales	2	64377	59	173	34	38	4053	422	92	44	675	132	1032	548	17711	172	5657	359	4108	1235	467	7080	254	140	1200	1435	15434	1823
5	0.1.7.1.1.1	Fusobacteriaceae	1	11090	3	3	0	2	207	89	2	0	1	1	8	16	3457	38	621	30	302	445	33	2313	43	17	11	390	2737	321
6	0.1.7.1.1.1.1	Fusobacterium	0	11090	3	3	0	2	207	89	2	0	1	1	8	16	3457	38	621	30	302	445	33	2313	43	17	11	390	2737	321
5	0.1.7.1.1.2	Leptotrichiaceae	4	53287	56	170	34	36	3846	333	90	44	674	131	1024	532	14254	134	5036	329	3806	790	434	4767	211	123	1189	1045	12697	1502
6	0.1.7.1.1.2.1	Leptotrichia	0	34371	9	65	7	4	325	49	70	39	7	68	126	44	13165	98	4168	153	3310	396	269	3515	139	49	275	337	6829	855
6	0.1.7.1.1.2.3	Streptobacillus	0	1562	0	0	0	0	1	0	0	0	0	0	0	0	966	8	3	0	233	62	19	87	1	0	2	16	0	164
6	0.1.7.1.1.2.4	unclassified	0	17353	47	105	27	32	3520	284	20	5	667	63	898	488	123	28	865	176	263	332	146	1165	71	74	911	692	5868	483
2	0.1.8	Gemmatimonadetes	1	74	0	0	0	1	0	0	0	0	0	0	0	0	71	0	0	0	2	0	0	0	0	0	0	0	0	0
3	0.1.8.1	Gemmatimonadetes	1	74	0	0	0	1	0	0	0	0	0	0	0	0	71	0	0	0	2	0	0	0	0	0	0	0	0	0
4	0.1.8.1.1	Gemmatimonadales	1	74	0	0	0	1	0	0	0	0	0	0	0	0	71	0	0	0	2	0	0	0	0	0	0	0	0	0
5	0.1.8.1.1.1	Gemmatimonadaceae	1	74	0	0	0	1	0	0	0	0	0	0	0	0	71	0	0	0	2	0	0	0	0	0	0	0	0	0
6	0.1.8.1.1.1.1	Gemmatimonas	0	74	0	0	0	1	0	0	0	0	0	0	0	0	71	0	0	0	2	0	0	0	0	0	0	0	0	0
2	0.1.9	Planctomycetes	1	196	0	0	0	0	0	0	0	0	0	0	0	0	196	0	0	0	0	0	0	0	0	0	0	0	0	0
3	0.1.9.1	Planctomycetacia	1	196	0	0	0	0	0	0	0	0	0	0	0	0	196	0	0	0	0	0	0	0	0	0	0	0	0	0
4	0.1.9.1.1	Planctomycetales	1	196	0	0	0	0	0	0	0	0	0	0	0	0	196	0	0	0	0	0	0	0	0	0	0	0	0	0
5	0.1.9.1.1.1	Planctomycetaceae	2	196	0	0	0	0	0	0	0	0	0	0	0	0	196	0	0	0	0	0	0	0	0	0	0	0	0	0
6	0.1.9.1.1.1.1	Singulisphaera	0	14	0	0	0	0	0	0	0	0	0	0	0	0	14	0	0	0	0	0	0	0	0	0	0	0	0	0
6	0.1.9.1.1.1.2	unclassified	0	182	0	0	0	0	0	0	0	0	0	0	0	0	182	0	0	0	0	0	0	0	0	0	0	0	0	0

## Sheet: ST 3
Supplementary Table 3. Average relative abundance of most abundant bacterial families.
Family	Average_Infant	Average_Mother	P-value	Adjusted
Streptococcaceae	0.65022	0.369684	1.405e-05	0.0004794
Peptostreptococcaceae	3.34287e-05	0.00093085	0.0001599	0.0052767
Fusobacteriaceae	0.000466382	0.00895373	0.0001955	0.006256
Lachnospiraceae	0.00104507	0.0105011	0.0003831	0.0118761
Lactobacillaceae	2.00357e-05	0.00179614	0.0004179	0.012537
Spirochaetaceae	6.30863e-05	0.00223288	0.0004179	0.012537
Campylobacteraceae	0.000737287	0.00195241	0.0006931	0.0194068
Porphyromonadaceae	0.00280762	0.0119069	0.00556	0.15012
Leptotrichiaceae	0.0229735	0.0424871	0.01209	0.31434
Prevotellaceae	0.0474401	0.119486	0.01209	0.31434
Actinomycetaceae	0.0324708	0.0816084	0.01727	0.41448
Bacillales_Incertae_Sedis_XI	0.0264602	0.0609468	0.01727	0.41448
Pasteurellaceae	0.0270512	0.0832032	0.02049	0.45078
Staphylococcaceae	0.000635643	6.84715e-05	0.03042	0.63882
unclassified	0.062237	0.0379875	0.03324	0.6648
Bifidobacteriaceae	9.75497e-05	0.000311394	0.03679	0.69901
Dermabacteraceae	0.000244903	1.30459e-05	0.04197	0.75546
Flavobacteriaceae	0.00928989	0.0046571	0.6297	1
Micrococcaceae	0.0481295	0.0352137	0.08873	1
Neisseriaceae	0.0292524	0.0806057	0.1005	1
Sphingomonadaceae	0.00239627	0.00518901	0.8428	1
Veillonellaceae	0.0197876	0.0198887	0.7553	1
Xanthomonadaceae	0.000245046	0.000271705	0.9323	1
Carnobacteriaceae	0.0114208	0.010557	0.7553	1
Bacillaceae_1	0.000102323	0.000182254	0.8625	1
Aerococcaceae	0.000799263	0.00462659	0.148	1
Corynebacteriaceae	0.000287389	0.000119751	0.9307	1
Coriobacteriaceae	0.00026362	0.000684045	0.0713	1
Enterobacteriaceae	0.000133896	4.11717e-05	0.08092	1
Cardiobacteriaceae	3.46452e-05	0.000123152	0.1029	1
Caulobacteraceae	3.95051e-05	6.15394e-05	0.358	1
Comamonadaceae	0.000353226	3.76241e-05	0.6142	1
Intrasporangiaceae	0.000127266	1.46121e-05	0.0676	1

## Sheet: ST 4
Supplementary Table 4. OTU enriched in premasticated food samples comparing to those in mothers' saliva samples.
rankID	Name	Ave-Mother	Ave-Food	ratio (Food/Mother)
0.1.10.5.1.1.4	unclassified	4.42611e-06	0.00443977	1003.09
0.1.10.5.11.1.1	Acinetobacter	1.32783e-05	0.00358916	270.302
0.1.15.1.1.9.1	Jeotgalibacillus	1.32783e-05	0.0022157	166.866
0.1.2.1.2.12.1	Janibacter	2.21306e-05	0.00346071	156.377
0.1.15.1.1.11.5	unclassified	4.42611e-06	0.000684602	154.674
0.1.2.1.2.15.3	Micrococcus	4.42611e-06	0.000657046	148.448
0.1.10.2.1.4.11	unclassified	4.42611e-06	0.000525292	118.68
0.1.4.3.1.2.4	Flavobacterium	4.42611e-06	0.000505486	114.206
0.1.10.5.14.1.1	unclassified	4.42611e-06	0.000463291	104.672
0.1.2.1.2.15.4	Nesterenkonia	2.65567e-05	0.00270052	101.689
0.1.10.1.6.1.2	Erythrobacter	4.42611e-06	0.000409039	92.415
0.1.2.1.2.20.1	Aeromicrobium	4.42611e-06	0.000382344	86.3837
0.1.2.1.2.6.1	Brachybacterium	5.31133e-05	0.00414895	78.115
0.1.6.1.1.1.1	Deinococcus	8.85222e-06	0.000630351	71.2082
0.1.2.1.2.9.1	Dietzia	1.77044e-05	0.00111086	62.7449
0.1.2.1.2.20.4	Nocardioides	2.21306e-05	0.00136571	61.7116
0.1.2.1.2.3.1	Brevibacterium	1.77044e-05	0.000936867	52.917
0.1.2.1.2.24.5	unclassified	4.42611e-06	0.000231645	52.3361
0.1.15.1.1.5.1	Exiguobacterium	1.77044e-05	0.000866302	48.9313
0.1.4.2.1.6.3	Sphingobacterium	8.85222e-06	0.000429706	48.5422
0.1.15.1.1.11.4	Staphylococcus	8.40961e-05	0.00380406	45.2347
0.1.10.5.1.1.2	Pantoea	8.85222e-06	0.000398706	45.0402
0.1.2.1.2.12.6	unclassified	2.21306e-05	0.000987722	44.6316
0.1.2.1.2.15.1	Arthrobacter	8.85222e-06	0.0003944	44.5538
0.1.10.1.4.1.1	Paracoccus	8.85222e-06	0.000375455	42.4136
0.1.15.3.1.1.3	Solobacterium	8.85222e-06	0.000368171	41.5908
0.1.2.1.2.14.7	unclassified	4.42611e-06	0.000155865	35.215
0.1.2.1.2.7.2	Kytococcus	4.42611e-06	0.000151463	34.2204
0.1.10.3.4.5.1	unclassified	4.42611e-06	0.000130031	29.3783
0.1.2.1.2.15.2	Kocuria	1.77044e-05	0.000465013	26.2653
0.1.2.1.5.1.1	Nitriliruptor	4.42611e-06	0.00010501	23.7252
0.1.10.1.2.1.2	Phenylobacterium	8.85222e-06	0.00017304	19.5476
0.1.10.1.3.5.1	Devosia	4.42611e-06	8.52524e-05	19.2612
0.1.2.1.2.8.1	Piscicoccus	8.85222e-06	0.000169644	19.164
0.1.10.1.2.1.1	Brevundimonas	4.42611e-05	0.000806022	18.2106
0.1.10.5.11.2.2	Pseudomonas	8.85222e-06	0.00015931	17.9966
0.1.2.1.2.7.1	Dermacoccus	3.9835e-05	0.000633795	15.9105
0.1.10.2.1.5.5	unclassified	8.85222e-06	0.000135198	15.2728
0.1.2.1.2.14.5	Microbacterium	4.42611e-06	6.3724e-05	14.3973
0.1.10.5.11.1.3	Enhydrobacter	4.42611e-06	6.28629e-05	14.2027
0.1.2.1.2.5.1	Corynebacterium	7.52439e-05	0.00106594	14.1665
0.1.10.5.9.1.1	Halomonas	8.85222e-06	0.000123142	13.9109
0.1.2.1.2.20.5	unclassified	1.77044e-05	0.000194617	10.9925
0.1.10.2.1.4.5	Delftia	8.85222e-06	9.64471e-05	10.8952
0.1.10.1.3.3.3	Bradyrhizobium	2.65567e-05	0.000282356	10.6322
0.1.2.1.2.15.8	unclassified	2.21306e-05	0.000230784	10.4283
0.1.10.2.1.5.2	Massilia	4.42611e-06	4.39179e-05	9.92246
0.1.2.1.8.1.1	unclassified	8.85222e-06	8.52524e-05	9.63062
0.1.10.1.3.10.1	unclassified	2.21306e-05	0.000210978	9.53334
0.1.10.5.13.1.6	Pseudoxanthomonas	4.42611e-06	4.04733e-05	9.14422
0.1.10.5.5.1.2	unclassified	2.65567e-05	0.000224893	8.46841
0.1.15.1.1.12.1	unclassified	1.77044e-05	0.000145484	8.21735
0.1.2.1.3.1.4	unclassified	8.85222e-06	7.03715e-05	7.94959
0.1.4.2.1.4.3	Sediminibacterium	8.85222e-06	6.28629e-05	7.10137
0.1.10.4.1.2.1	Wolinella	2.21306e-05	0.000153089	6.91753
0.1.8.1.1.1.1	Gemmatimonas	8.85222e-06	6.11406e-05	6.90681
0.1.10.6.1.1.1	unclassified	1.77044e-05	0.000112567	6.35813
0.1.10.1.7.1.1	unclassified	2.21306e-05	0.000136059	6.14803
0.1.2.1.3.1.2	Bifidobacterium	0.000202225	0.00120147	5.94123
0.1.10.2.5.1.1	unclassified	3.9835e-05	0.000211791	5.31671
0.1.4.1.1.3.3	unclassified	0.000523956	0.00260475	4.97131
0.1.1.4.1.1.1	Gp4	4.42611e-06	1.98061e-05	4.47483
0.1.15.4.1.2.9	unclassified	4.42611e-05	0.000163994	3.70514
0.1.15.1.3.1.1	unclassified	8.85222e-06	2.83691e-05	3.20475
0.1.15.1.2.2.2	Dolosigranulum	4.42611e-06	1.37782e-05	3.11293
0.1.2.1.4.1.1	Atopobium	0.000333633	0.0010164	3.04645
0.1.10.2.1.4.2	Brachymonas	2.65567e-05	7.74538e-05	2.91655
0.1.10.5.13.1.5	Lysobacter	1.32783e-05	3.78899e-05	2.85352
0.1.15.1.1.6.1	Brevibacillus	4.42611e-06	1.20559e-05	2.72381
0.1.2.1.2.23.3	unclassified	7.08178e-05	0.000166102	2.34549
0.1.4.1.1.5.1	unclassified	0.00102883	0.00218222	2.12107
0.1.4.3.1.2.11	unclassified	0.000925356	0.00170953	1.84743
0.1.11.1.1.1.1	Treponema	0.00873355	0.0159769	1.82937
0.1.10.2.1.7.1	unclassified	0.00608357	0.0109022	1.79208
0.1.10.5.13.1.7	Stenotrophomonas	0.00124739	0.00214551	1.72001
0.1.15.1.2.7.1	unclassified	0.0170409	0.0268168	1.57367
0.1.15.1.2.2.4	unclassified	2.65567e-05	4.0425e-05	1.52222
0.1.19.1.1.1.1	unclassified	0.00235726	0.00321368	1.36331
0.1.10.1.3.9.2	Rhizobium	0.000175669	0.00023509	1.33826
0.1.10.5.5.1.1	Cardiobacterium	0.0005992	0.000784108	1.30859
0.1.4.3.1.2.1	Capnocytophaga	0.00746649	0.00967287	1.2955
0.1.4.1.1.2.4	Porphyromonas	0.0146856	0.0184647	1.25733
0.1.15.2.1.4.3	Parvimonas	0.000193373	0.000235371	1.21719
0.1.7.1.1.1.1	Fusobacterium	0.00669557	0.00738423	1.10285
0.1.10.1.6.1.3	Porphyrobacter	1.32783e-05	1.46393e-05	1.1025
0.1.15.4.1.2.8	Veillonella	0.0137185	0.0117984	0.860034
0.1.15.4.1.2.5	Megasphaera	0.000667266	0.000573258	0.859114
0.1.10.5.1.1.1	Escherichia_Shigella	0.00016239	0.000130893	0.806036
0.1.15.1.2.4.1	Lactobacillus	0.00422353	0.00331417	0.784694
0.1.4.1.1.1.1	Phocaeicola	1.77044e-05	1.37299e-05	0.775503
0.1.7.1.1.2.3	Streptobacillus	0.0041167	0.00308355	0.749035
0.1.4.1.1.2.6	unclassified	0.00354298	0.00263227	0.742953
0.1.2.1.2.14.1	Agrococcus	1.32783e-05	9.47249e-06	0.713379
0.1.10.3.1.1.1	Desulfobulbus	2.21306e-05	1.55004e-05	0.700409
0.1.15.1.2.2.3	Granulicatella	0.0447974	0.0309025	0.689829
0.1.10.5.10.1.3	Haemophilus	0.0255993	0.0176346	0.688871
0.1.4.1.1.2.5	Tannerella	0.000810277	0.000549211	0.677806
0.1.15.4.1.2.2	Anaeroglobus	0.000351337	0.000230253	0.655361
0.1.15.1.2.1.1	Abiotrophia	0.0114176	0.00705219	0.617658
0.1.4.4.1.1.1	unclassified	0.0185191	0.0111382	0.601444
0.1.15.2.2.1.1	unclassified	0.000500449	0.000289236	0.577953
0.1.10.5.10.1.2	Aggregatibacter	0.00167977	0.000951762	0.566603
0.1.15.5.1.1.1	unclassified	0.000224356	0.000121082	0.539687
0.1.2.1.2.27.1	unclassified	0.00369927	0.00198448	0.536452
0.1.13.1.1.1.1	Mycoplasma	0.00046199	0.000239251	0.517869
0.1.4.1.1.3.2	Prevotella	0.21231	0.108236	0.509801
0.1.15.2.1.6.1	Eubacterium	0.000776244	0.000393007	0.506294
0.1.10.2.3.1.1	Kingella	0.000668642	0.00032641	0.488169
0.1.2.1.3.1.3	Scardovia	0.000342485	0.000165338	0.482759
0.1.15.1.2.6.2	Streptococcus	0.677887	0.326721	0.481969
0.1.10.4.1.1.2	Campylobacter	0.00664658	0.00307578	0.462761
0.1.10.1.6.2.3	Sphingomonas	0.0201589	0.00913716	0.453257
0.1.10.2.3.1.4	unclassified	0.00242306	0.00108646	0.448385
0.1.10.5.10.1.5	unclassified	0.185167	0.0807611	0.436152
0.1.10.5.10.1.1	Actinobacillus	0.0276662	0.0116975	0.422809
0.1.15.2.1.5.2	Mogibacterium	0.000166816	6.78364e-05	0.406653
0.1.7.1.1.2.1	Leptotrichia	0.0583334	0.0230759	0.395586
0.1.2.1.2.15.5	Rothia	0.0371232	0.0136277	0.367094
0.1.10.1.5.1.3	unclassified	0.00016239	5.94183e-05	0.365898
0.1.15.2.1.7.5	Johnsonella	0.000208027	7.48704e-05	0.359907
0.1.17.1.1.1.1	SR1_genus_incertae_sedis	0.00114696	0.00040009	0.348826
0.1.10.2.3.1.2	Neisseria	0.323271	0.108091	0.334365
0.1.2.1.2.1.1	Actinomyces	0.0372076	0.0124114	0.333571
0.1.15.4.1.2.4	Dialister	0.00236779	0.000787197	0.332461
0.1.7.1.1.2.4	unclassified	0.0248731	0.00673744	0.270873
0.1.15.4.1.2.7	Selenomonas	0.00457486	0.00121857	0.266362
0.1.15.2.1.7.4	Howardella	0.00016239	4.11896e-05	0.253645
0.1.2.1.4.1.3	Olsenella	0.000504876	0.000127923	0.253375
0.1.10.5.11.1.4	Moraxella	0.00517855	0.00121643	0.234898
0.1.15.1.1.4.1	Gemella	0.135983	0.029589	0.217594
0.1.15.2.1.10.1	unclassified	0.0049981	0.00107932	0.215945
0.1.15.2.1.7.3	Catonella	0.00262313	0.000550402	0.209827
0.1.15.2.1.8.1	Filifactor	0.00169245	0.000350715	0.207223
0.1.15.1.1.11.2	Macrococcus	4.42611e-06	8.61135e-07	0.194558
0.1.4.1.1.3.1	Hallella	0.000698249	0.00012204	0.17478
0.1.15.2.1.7.9	Shuttleworthia	0.0010009	0.000157917	0.157776
0.1.15.2.1.7.7	Oribacterium	0.00386776	0.000564888	0.14605
0.1.15.1.1.2.2	Bacillus	0.000504876	6.20017e-05	0.122806
0.1.15.2.1.7.10	unclassified	0.0127356	0.00133296	0.104664
0.1.15.2.1.8.2	Peptostreptococcaceae_incertae_sedis	0.000259765	2.23412e-05	0.0860055
0.1.15.2.1.8.3	Peptostreptococcus	0.00155004	8.23791e-05	0.0531466
0.1.2.1.2.1.3	unclassified	0.000171243	3.44454e-06	0.020115

## Sheet: ST 5
Supplementary Table 5. Percentage of maternal and infant samples positive for each of 15 genera predictive of gingivitis.
Genus	Occurrence in Infant Samples Count (% )	Occurrence in Maternal Samples Count(%)
Aggregatibacter	2 (17%)	8 (67%)
Campylobacter	7 (58%)	12 (100%)
Catonella	2 (17%)	11 (92%)
Eubacterium	0 (0%)	10 (83%)
Fusobacterium	10 (83%)	12 (100%)
Johnsonella	0 (0%)	6 (50%)
Leptotrichia	12 (100%)	12 (100%)
Oribacterium	3 (25%)	12 (100%)
Peptostreptococcus	1 (8%)	9 (75%)
Porphyromonas	11 (92%)	12 (100%)
Prevotella	12 (100%)	12 (100%)
Selenomonas	4 (33%)	10 (83%)
Tannerella	4 (33%)	9 (75%)
Treponema	4 (33%)	11 (92%)
